# Supplementary material
Source: PubMed Central journal article supplement (PMC10234672)
Supplement: NIHMS1898278-supplement-1.pdf [file NIHMS1898278-supplement-1.pdf]

APPENDIX

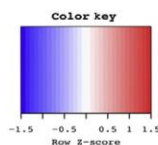

IL-17/TNF- $\alpha$ -related genes

| N | NS | CIE | LI | EI | Markers   | NS versus N | CIE versus N | LI versus N | EI versus N |
|---|----|-----|----|----|-----------|-------------|--------------|-------------|-------------|
|   |    |     |    |    | SERPIN3   | 52.30**     | 49.80**      | 48.80**     | 30.80**     |
|   |    |     |    |    | EIF       | 6.38**      | 5.99**       | 5.89**      | 4.75**      |
|   |    |     |    |    | LCE3D     | 34.20**     | 29.00**      | 26.90**     | 17.20**     |
|   |    |     |    |    | SPRR2A    | 519.00**    | 243.00**     | 441.00**    | 173.00**    |
|   |    |     |    |    | SPRR2B    | 290.00**    | 190.00**     | 290.00**    | 98.20**     |
|   |    |     |    |    | S100A9    | 273.00**    | 120.00**     | 156.00**    | 86.40**     |
|   |    |     |    |    | S100A8    | 176.00**    | 80.60**      | 95.10**     | 53.40**     |
|   |    |     |    |    | SERPIN4   | 585.00**    | 316.00**     | 354.00**    | 130.00**    |
|   |    |     |    |    | TMEM45B   | 4.25**      | 3.57**       | 3.53**      | 2.94**      |
|   |    |     |    |    | GRHL3     | 3.63**      | 3.14**       | 3.47**      | 2.49**      |
|   |    |     |    |    | SPRR2D    | 36.10**     | 22.60**      | 32.20**     | 13.40**     |
|   |    |     |    |    | SPRR2F    | 521.00**    | 248.00**     | 342.00**    | 74.80**     |
|   |    |     |    |    | SPRR2E    | 13.10**     | 11.00**      | 11.80**     | 6.48**      |
|   |    |     |    |    | S100A7    | 223.00**    | 85.50**      | 125.00**    | 46.40**     |
|   |    |     |    |    | FUT2      | 4.37**      | 3.36**       | 3.88**      | 2.92**      |
|   |    |     |    |    | S100A7A   | 2200.00**   | 497.00**     | 813.00**    | 176.00**    |
|   |    |     |    |    | ZC3H12A   | 8.52**      | 3.98**       | 5.18**      | 3.19**      |
|   |    |     |    |    | PDZK1IP1  | 2.82**      | 2.25**       | 3.02**      | 2.18**      |
|   |    |     |    |    | EP3       | 2.98**      | 1.77**       | 2.29**      | 1.71**      |
|   |    |     |    |    | ZSWIM4    | 2.38**      | 2.04**       | 2.47**      | 1.97**      |
|   |    |     |    |    | TGM1      | 2.75**      | 2.15**       | 2.15**      | 1.32**      |
|   |    |     |    |    | SPRR2G    | 36.80**     | 23.25**      | 23.20**     | 13.20**     |
|   |    |     |    |    | S100A12   | 194.00**    | 80.70**      | 87.10**     | 40.40**     |
|   |    |     |    |    | GJB2      | 7.59**      | 5.49**       | 5.36**      | 3.98**      |
|   |    |     |    |    | MPPEL2    | 4.79**      | 3.75**       | 3.38**      | 2.94**      |
|   |    |     |    |    | TMPPRS11D | 98.80**     | 36.80**      | 34.50**     | 16.50**     |
|   |    |     |    |    | SPRR2C    | 379.00**    | 97.00**      | 75.60**     | 27.90**     |
|   |    |     |    |    | CNFN      | 6.71**      | 4.27**       | 4.42**      | 4.16**      |
|   |    |     |    |    | PI3       | 222.00**    | 90.50**      | 93.10**     | 87.80**     |
|   |    |     |    |    | GAT6      | 5.10**      | 3.33**       | 3.07**      | 3.18**      |
|   |    |     |    |    | A2ML1     | 4.67**      | 4.83**       | 6.98**      | 3.10**      |
|   |    |     |    |    | LCN2      | 12.40**     | 14.10**      | 24.40**     | 7.81**      |
|   |    |     |    |    | KIF11     | 7.70**      | 8.37**       | 10.90**     | 5.48**      |
|   |    |     |    |    | VNN3      | 106.00**    | 90.40**      | 162.00**    | 33.80**     |
|   |    |     |    |    | NFKB12    | 2.43**      | 2.54**       | 2.85**      | 1.85**      |
|   |    |     |    |    | IRAK2     | 2.94**      | 3.03**       | 3.69**      | 1.87**      |
|   |    |     |    |    | SDCBP2    | 2.88**      | 2.98**       | 3.88**      | 1.84**      |
|   |    |     |    |    | NOD2      | 3.08**      | 2.49**       | 3.15**      | 1.99**      |
|   |    |     |    |    | GFOD2     | 2.04**      | 1.87**       | 2.08**      | 1.47**      |
|   |    |     |    |    | RFC3      | 10.80**     | 6.48**       | 10.20**     | 2.90**      |
|   |    |     |    |    | TGM3      | 8.12**      | 3.67**       | 3.64**      | 1.45**      |
|   |    |     |    |    | PRDM1     | 2.51**      | 2.26**       | 2.26**      | 1.31**      |
|   |    |     |    |    | FLA2G3    | 4.66**      | 3.78**       | 3.22**      | 1.98**      |
|   |    |     |    |    | DCUH1D3   | 2.09**      | 1.71**       | 1.52**      | 1.42**      |
|   |    |     |    |    | AZF12A    | 9.44**      | 18.30**      | 24.40**     | 11.28**     |
|   |    |     |    |    | CCL20     | 16.10**     | 18.30**      | 7.80**      | 17.70**     |
|   |    |     |    |    | IL17C     | 5.42**      | 10.20**      | 22.40**     | 5.18**      |
|   |    |     |    |    | CRABP2    | 1.75**      | 2.64**       | 3.75**      | 1.03**      |
|   |    |     |    |    | TNFR79    | 1.93**      | 2.64**       | 3.01**      | 0.81**      |
|   |    |     |    |    | ALOX12B   | 3.31**      | 2.72**       | 3.32**      | 2.95**      |
|   |    |     |    |    | FOXO1     | 18.40**     | 7.96**       | 11.80**     | 10.10**     |
|   |    |     |    |    | GPR110    | 43.30**     | 39.10**      | 55.20**     | 40.50**     |
|   |    |     |    |    | GLTP      | 2.10**      | 2.00**       | 2.44**      | 2.24**      |
|   |    |     |    |    | ATP10B    | 2.43**      | 2.55**       | 2.94**      | 2.89**      |
|   |    |     |    |    | SOX7      | 2.96**      | 2.57**       | 3.41**      | 3.04**      |
|   |    |     |    |    | KRTDAP    | 1.84**      | 0.95**       | 1.48**      | 0.86**      |
|   |    |     |    |    | CSTA      | 2.77**      | 2.60**       | 3.25**      | 2.55**      |
|   |    |     |    |    | CYP2S1    | 2.49**      | 2.39**       | 2.15**      | 1.55**      |
|   |    |     |    |    | SLC6A14   | 4.55**      | 4.41**       | 4.68**      | 3.71**      |
|   |    |     |    |    | CHE1      | 7.76**      | 7.86**       | 8.68**      | 3.31**      |
|   |    |     |    |    | DUOX1     | 2.82**      | 2.02**       | 1.27**      | 0.87**      |
|   |    |     |    |    | RLK10     | 4.13**      | 4.74**       | 5.75**      | 3.75**      |
|   |    |     |    |    | C9orf169  | 4.13**      | 2.95**       | 3.79**      | 2.75**      |
|   |    |     |    |    | SULT2B1   | 2.12**      | 1.71**       | 2.11**      | 2.36**      |
|   |    |     |    |    | FIT1      | 2.20**      | 1.66**       | 1.60**      | 2.90**      |
|   |    |     |    |    | FMEPA1    | -1.77**     | -1.72**      | -1.11**     | -1.91**     |
|   |    |     |    |    | PANX2     | -2.21**     | -2.21**      | -2.96**     | -2.27**     |
|   |    |     |    |    | ADRB2     | -2.17**     | -2.40**      | -2.75**     | -2.52**     |
|   |    |     |    |    | FUT8      | -1.75**     | -1.59**      | -2.05**     | -1.91**     |
|   |    |     |    |    | GGT1      | -1.70**     | -1.50**      | -2.09**     | -1.93**     |
|   |    |     |    |    | LOX       | -2.04**     | -2.10**      | -2.95**     | -3.16**     |
|   |    |     |    |    | PDGFRL    | -2.26**     | -2.64**      | -3.27**     | -4.19**     |
|   |    |     |    |    | PIK3IP1   | -2.64**     | -2.29**      | -2.92**     | -2.84**     |
|   |    |     |    |    | PDE1A     | -2.16**     | -1.68**      | -2.04**     | -2.45**     |

Supplementary Figure S1. IL-17/TNF- $\alpha$ -associated markers are strongly upregulated in all subtypes.

Heatmap representing differentially expressed genes synergistically upregulated by IL-17 and/or TNF- $\alpha$  in ichthyosis subtypes and in healthy controls. Criteria for differential gene expression include FCH > 2 and FDR < 0.05. From left to right, heatmap columns represent N, NS, CIE, LI, and EI. The table shows FCHs in NS versus N, CIE versus N, LI versus N, and EI versus N

N. \*\*FDR < 0.01, \*FDR < 0.05, and <sup>+</sup>FDR < 0.1. N denotes normal. CIE, congenital ichthyosiform erythroderma; EI, epidermolytic ichthyosis; FCH, fold change; FDR, false discovery rate; LI, lamellar ichthyosis; NS, Netherton syndrome.

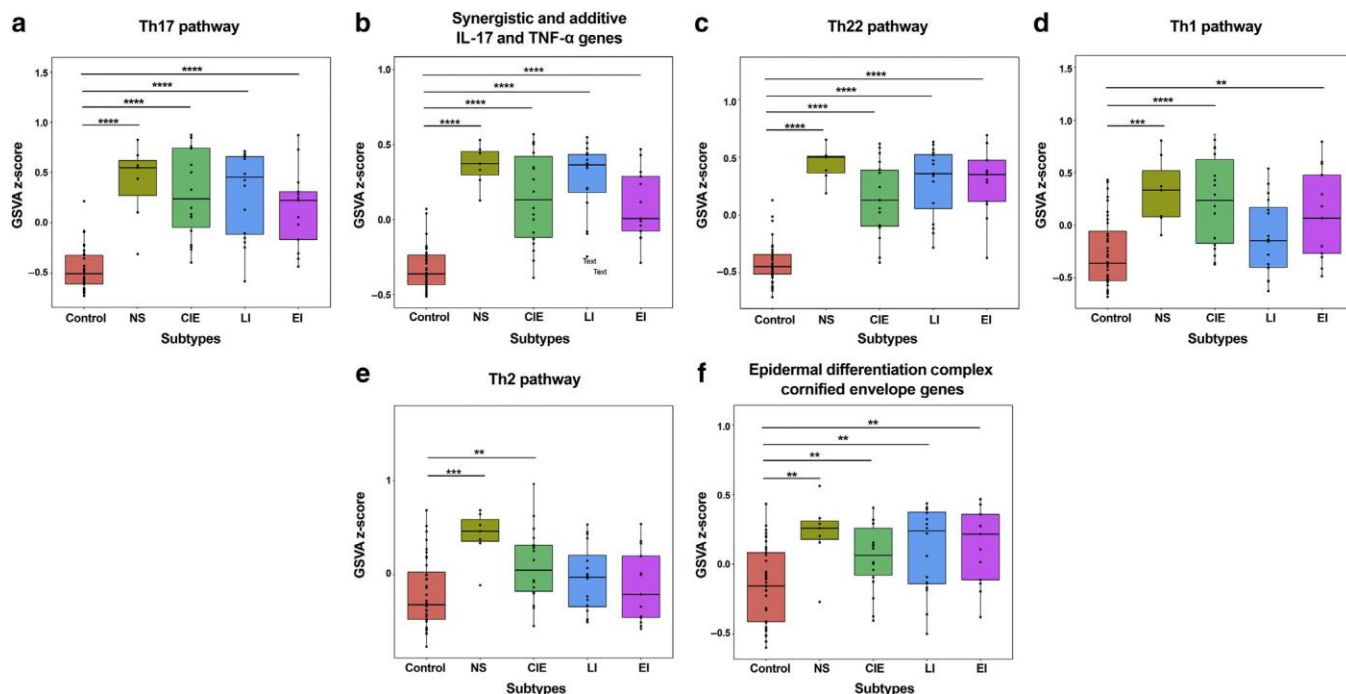

Supplementary Figure S2. Th17/Th22 and EDC/CE are strongly upregulated in all subtypes, whereas Th1 and Th2 show comparatively modest and variable modulation. Boxplots of mean GSVA z-score depicting the pathways of genes related to a selection of immune axes. (a) Th17, (b) genes synergistically upregulated by IL-17 and/or TNF- $\alpha$ , (c) Th22, (d) Th1, (e) Th1, and (f) EDC and CE. \*\*\*\* $P < 0.0001$ , \*\*\* $P < 0.001$ , \*\* $P < 0.01$ , and \* $P < 0.05$ . CE, cornified envelope; CIE, congenital ichthyosiform erythroderma; EDC, epidermal differentiation complex; EI, epidermolytic ichthyosis; GSVA, gene set variation analysis; LI, lamellar ichthyosis; NS, Netherton syndrome; Th, T helper.

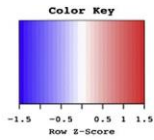

RT-PCR

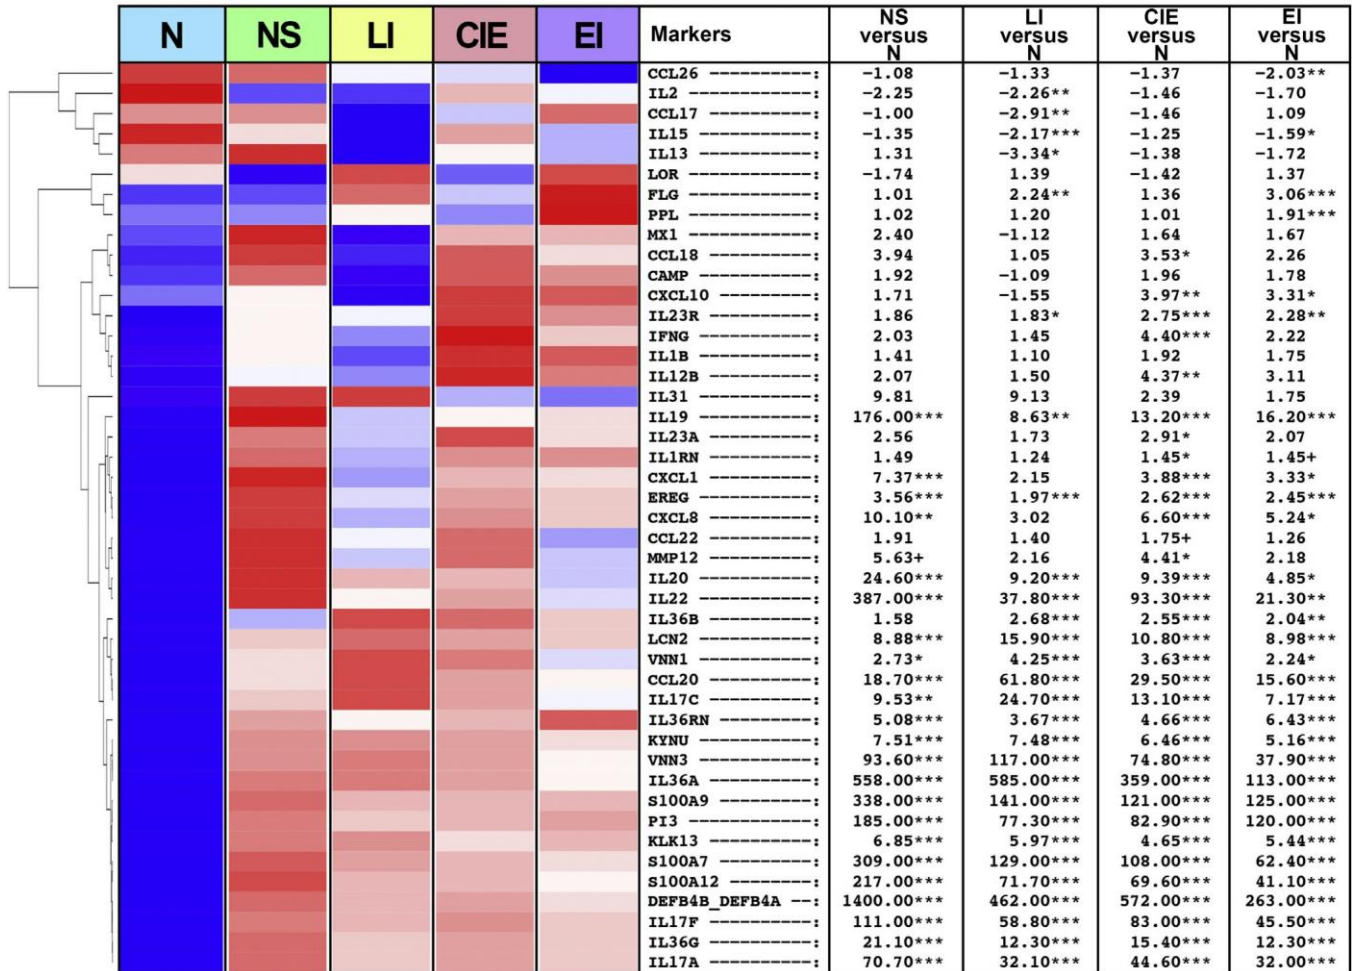

Supplementary Figure S3. RT-PCR analysis supports RNA-seq data. Heatmap representing the genes sequenced with RT-PCR from biopsied skin of patients with the various ichthyosis subtypes and healthy controls. Criteria for differential gene expression include FCH > 2 and FDR < 0.05. From left to right, heatmap columns represent N, NS, CIE, LI, and EI. The table shows FCHs in NS versus N, CIE versus N, LI versus N, and EI versus N. N denotes normal. \*\*FDR < 0.01,

\*FDR < 0.05, and +FDR < 0.1. CIE, congenital ichthyosiform erythroderma; EI, epidermolytic ichthyosis; FDR, false discovery rate; LI, lamellar ichthyosis; NS, Netherton syndrome; RNA-seq, RNA-sequencing.

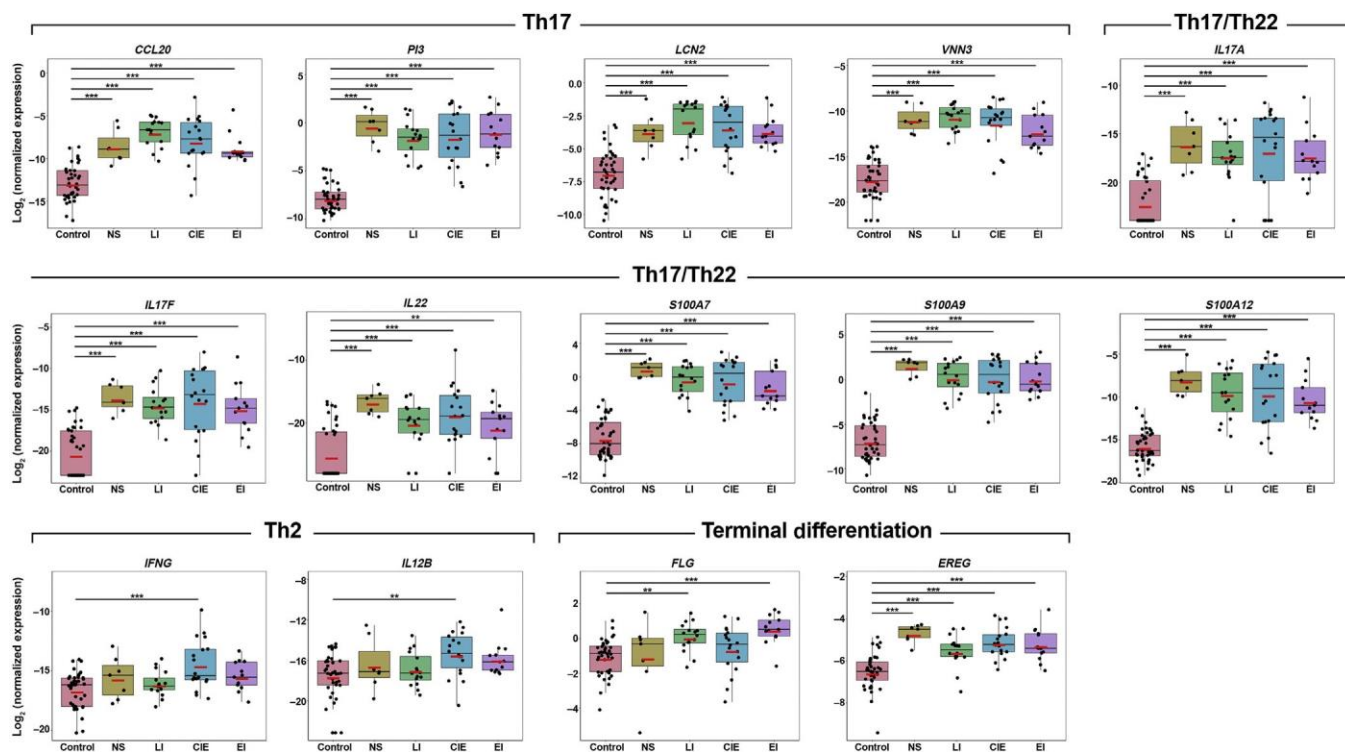

**Supplementary Figure S4. RT-PCR analysis supports RNA-seq of immune and terminal differentiation marker expression.** Boxplots of  $\log_2$ -normalized expression of a selection of genes sequenced with RT-PCR, representing Th17-specific, Th17/Th2, Th2, and terminal differentiation pathways. \*\*\*\* $P < 0.0001$ , \*\*\* $P < 0.001$ , \*\* $P < 0.01$ , and \* $P < 0.05$ . CIE, congenital ichthyosiform erythroderma; EI, epidermolytic ichthyosis; LI, lamellar ichthyosis; NS, Netherton syndrome; RNA-seq, RNA-sequencing; Th, T helper.

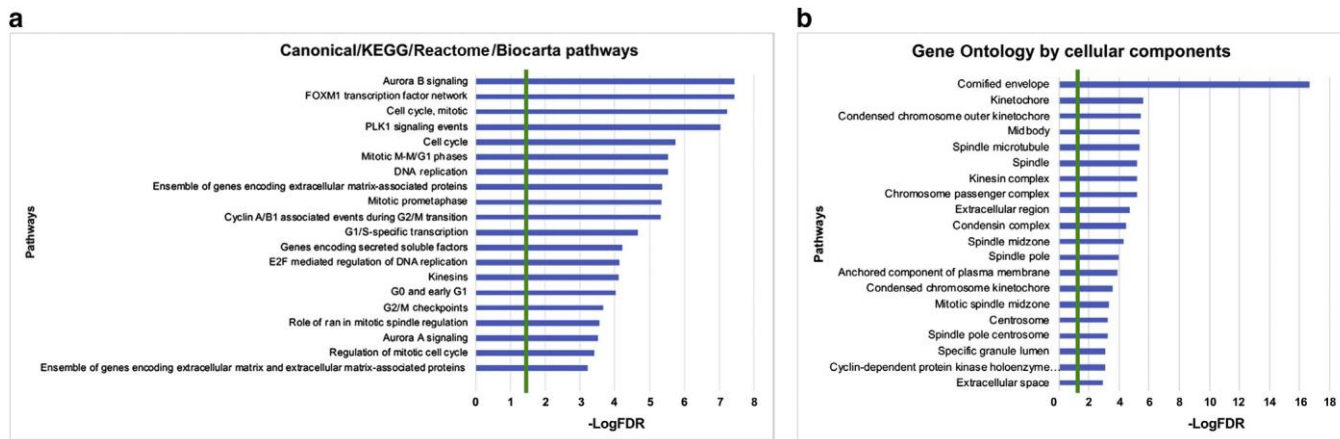

**Supplementary Figure S5. Pathway enrichment analysis highlights cellular proliferation signaling.** Barplots of  $-\log$  false discovery rates of all DEGs within the pathways from validated databases. (a) Enriched pathways from the canonical, KEGG, Reactome, and BioCarta databases. (b) Further localization of DEGs to cellular components is shown through the Gene Ontology database. DEG, differentially expressed gene; FDR, false discovery rate; KEGG, Kyoto Encyclopedia of Genes and Genomes.

Supplementary Table S1. Ichthyosis Cohort Demographics

| Subject No.     | Subtype | Gene           | Age (y) | Sex | Race                           | Flow Cytometry Performed |
|-----------------|---------|----------------|---------|-----|--------------------------------|--------------------------|
| 1               | LI      | <i>TGM1</i>    | 56.9    | F   | White/Caucasian                |                          |
| 2               | LI      | <i>TGM1</i>    | 37      | F   | Black/African American         |                          |
| 3               | NS      | <i>SPINK5</i>  | 6.3     | F   | Other                          |                          |
| 4               | EI      | <i>K10</i>     | 11.6    | M   | White/Caucasian                | Y                        |
| 5               | CIE     | <i>NIPAL4</i>  | 14.1    | F   | White/Caucasian                | Y                        |
| 6               | NS      | <i>SPINK5</i>  | 19.2    | M   | White/Caucasian                | Y                        |
| 7               | LI      | <i>TGM1</i>    | 28      | M   | White/Caucasian                | Y                        |
| 8               | EI      | <i>K10</i>     | 17.9    | M   | White/Caucasian                | Y                        |
| 9               | CIE     | <i>CerS3</i>   | 29.8    | M   | Asian/Pacific Islander         | Y                        |
| 10              | EI      | <i>K10</i>     | 40.3    | F   | White/Caucasian                |                          |
| 11              | CIE     | <i>ALOX12B</i> | 16.6    | M   | White/Caucasian                |                          |
| 12              | NS      | <i>SPINK5</i>  | 12.5    | F   | Black/African American         | Y                        |
| 13              | LI      | <i>TGM1</i>    | 9.2     | F   | White/Caucasian                | Y                        |
| 14              | LI      | <i>TGM1</i>    | 10.8    | M   | White/Caucasian                | Y                        |
| 15              | CIE     | <i>ALOXE3</i>  | 42.9    | F   | White/Caucasian                |                          |
| 16              | EI      | <i>K10</i>     | 55      | F   | White/Caucasian                |                          |
| 17              | NS      | <i>SPINK5</i>  | 23      | F   | White/Caucasian                |                          |
| 18              | LI      | <i>TGM1</i>    | 19      | F   | Other                          | Y                        |
| 19              | CIE     | <i>ALOX12B</i> | 11      | M   | White/Caucasian                | Y                        |
| 20              | EI      | <i>K10</i>     | 13      | F   | White/Caucasian                | Y                        |
| 21              | LI      | <i>TGM1</i>    | 35      | F   | White/Caucasian                | Y                        |
| 22              | CIE     | <i>ALOX12B</i> | 7       | M   | White/Caucasian                | Y                        |
| 27              | CIE     | <i>PNPLA1</i>  | 6       | M   | Asian/Pacific Islander         | Y                        |
| 28 <sup>1</sup> | CIE     | <i>ABCA12</i>  | 4       | M   | Black/African American         | Y                        |
| 29              | EI      | <i>K1</i>      | 2.2     | M   | White/Caucasian                | Y                        |
| 30              | CIE     | <i>GJA1</i>    |         | M   | White/Caucasian                | Y                        |
| 31              | CIE     | <i>GJA1</i>    | 31.56   | F   | Black/African American         |                          |
| 32              | CIE     | <i>NIPAL4</i>  | 46.94   | M   | White/Caucasian                |                          |
| 33 <sup>1</sup> | CIE     | <i>ABCA12</i>  | 7.4     | M   | Other                          |                          |
| 34              | EI      | <i>K1</i>      | 1.1     | F   | Asian/Pacific Islander         |                          |
| 35              | EI      | <i>K10</i>     | 17.7    | M   | Black/African American         |                          |
| 36              | EI      | <i>K10</i>     | 34      | F   | White/Caucasian                |                          |
| 39              | LI      | <i>TGM1</i>    | 41.3    | F   | White/Caucasian                | Y                        |
| 40              | NS      | <i>SPINK5</i>  | 43.2    | F   | White/Caucasian                | Y                        |
| 41              | LI      | <i>TGM1</i>    | 23.7    | F   | White/Caucasian                | Y                        |
| 42              | CIE     | <i>ALOX12B</i> | 15.1    | F   | White/Caucasian                | Y                        |
| 43              | EI      | <i>K10</i>     | 70.8    | M   | White/Caucasian                |                          |
| 44              | NS      | <i>SPINK5</i>  | 41.2    | F   | White/Caucasian                | Y                        |
| 47              | LI      | <i>TGM1</i>    | 24.7    | F   | White/Caucasian                | Y                        |
| 48              | LI      | <i>TGM1</i>    | 26.2    | M   | White/Caucasian                |                          |
| 49              | LI      | <i>TGM1</i>    | 42.7    | F   | Other                          | Y                        |
| 50              | EI      | <i>K10</i>     | 57.9    | F   | White/Caucasian                |                          |
| 51              | EI      | <i>K10</i>     | 18      | F   | Hispanic                       | Y                        |
| 52              | CIE     | <i>ABCA12</i>  | 32.2    | F   | White/Caucasian                | Y                        |
| 53              | NS      | <i>SPINK5</i>  | 18.9    | M   | White/Caucasian                | Y                        |
| 54              | EI      | <i>K10</i>     | 16.9    | M   | White/Caucasian                |                          |
| 55              | CIE     | <i>ALOX12B</i> | 17.5    | F   | American Indian/Alaskan Native | Y                        |
| 56              | LI      | <i>TGM1</i>    | 53.1    | M   | White/Caucasian                | Y                        |
| 57              | LI      | <i>TGM1</i>    | 56.6    | F   | White/Caucasian                | Y                        |
| 58 <sup>2</sup> | CIE     | <i>TGM1</i>    | 48.7    | F   | White/Caucasian                | Y                        |
| 59              | LI      | <i>TGM1</i>    | 10.5    | F   | White/Caucasian                |                          |
| 60              | LI      | <i>TGM1</i>    | 13.1    | M   | White/Caucasian                |                          |
| 62              | CIE     | <i>NIPAL4</i>  | 1       | M   | White/Caucasian                |                          |
| 64              | CIE     | <i>CerS3</i>   | 5.2     | M   | Other                          |                          |

<sup>1</sup>These patients presented with harlequin ichthyosis.

<sup>2</sup>This patient was born with LI but presented with CIE at the time of sample collection

Abbreviations: CIE, congenital ichthyosiform erythroderma; EI, epidermolytic ichthyosis; F, female; LI, lamellar ichthyosis; M, male; No., number; NS, Netherton syndrome; Y, yes.



**Supplementary Table S2. Comparison of Unique Genes in Subtypes and Common Phenotypes with Previous Work with Microarrays**

| Subtype Versus Controls | Upregulated RNA-Seq, Previously Insignificant | Downregulated RNA-Seq, Previously Insignificant | Upregulated in RNA-Seq and Previously Insignificant | Downregulated in RNA-Seq and Previously Insignificant | Upregulated RNA-Seq, Not Previously Measured | Downregulated RNA-Seq, Not Previously Measured |
|-------------------------|-----------------------------------------------|-------------------------------------------------|-----------------------------------------------------|-------------------------------------------------------|----------------------------------------------|------------------------------------------------|
| Common                  | 171                                           | 329                                             | 97                                                  | 41                                                    | 338                                          | 658                                            |
| NS                      | 38                                            | 88                                              | 8                                                   | 6                                                     | 188                                          | 814                                            |
| CIE                     | 23                                            | 6                                               | 3                                                   | 0                                                     | 249                                          | 150                                            |
| EI                      | 8                                             | 54                                              | 16                                                  | 11                                                    | 185                                          | 452                                            |
| LI                      | 20                                            | 80                                              | 16                                                  | 50                                                    | 152                                          | 588                                            |

Abbreviations: CIE, congenital ichthyosiform erythroderma; EI, epidermolytic ichthyosis; LI, lamellar ichthyosis; NS, Netherton syndrome; RNA-Seq, RNA-sequencing.

The previous work with microarrays was conducted by [Malik et al. \(2019\)](#)

Supplementary Table S3. Selection of RNA-Seq Marker Versus Clinical Index Correlations

|           | Marker    | TEWL   |         | IASI-E |         | IASI-S |         | IASI-SE |         |
|-----------|-----------|--------|---------|--------|---------|--------|---------|---------|---------|
|           |           | rho    | P-Value | rho    | P-Value | rho    | P-Value | rho     | P-Value |
| Th2       | CCL7      | 0.334  | 0.019   | 0.189  | 0.171   | -0.042 | 0.760   | 0.148   | 0.285   |
|           | CCL17     | 0.316  | 0.027   | -0.091 | 0.514   | -0.099 | 0.476   | -0.147  | 0.288   |
|           | CCL18     | 0.211  | 0.146   | 0.181  | 0.189   | -0.350 | 0.009   | -0.057  | 0.684   |
|           | CXCL13    | 0.090  | 0.536   | 0.327  | 0.016   | -0.153 | 0.270   | 0.187   | 0.177   |
|           | CCL23     | 0.133  | 0.362   | 0.316  | 0.020   | -0.351 | 0.009   | 0.007   | 0.962   |
|           | CCL22     | 0.070  | 0.632   | 0.288  | 0.035   | -0.139 | 0.317   | 0.156   | 0.261   |
|           | IL-4R     | 0.261  | 0.070   | 0.276  | 0.043   | -0.246 | 0.073   | 0.094   | 0.498   |
|           | IL-31     | -0.167 | 0.252   | -0.164 | 0.236   | 0.318  | 0.019   | 0.066   | 0.636   |
| Th17      | CXCL3     | 0.200  | 0.168   | 0.144  | 0.298   | -0.314 | 0.021   | -0.036  | 0.795   |
|           | CXCL2     | 0.170  | 0.242   | 0.258  | 0.060   | -0.405 | 0.002   | -0.021  | 0.882   |
| Th17/Th22 | FOXE1     | 0.254  | 0.078   | 0.226  | 0.101   | 0.315  | 0.020   | 0.397   | 0.003   |
|           | PITX1     | 0.218  | 0.132   | 0.237  | 0.085   | 0.209  | 0.129   | 0.317   | 0.020   |
|           | IL-23R    | -0.232 | 0.109   | 0.365  | 0.007   | 0.014  | 0.922   | 0.292   | 0.032   |
|           | CRABP2    | 0.197  | 0.174   | 0.144  | 0.299   | 0.210  | 0.128   | 0.273   | 0.046   |
|           | PANX2     | 0.243  | 0.093   | -0.199 | 0.150   | -0.225 | 0.101   | -0.287  | 0.036   |
|           | EPN3      | 0.458  | <0.001  | -0.068 | 0.624   | -0.077 | 0.579   | -0.104  | 0.454   |
|           | FAM43A    | 0.426  | 0.002   | 0.249  | 0.069   | -0.172 | 0.213   | 0.113   | 0.417   |
|           | HAS3      | 0.417  | 0.003   | 0.199  | 0.149   | -0.101 | 0.469   | 0.137   | 0.324   |
|           | TMPRSS11D | 0.385  | 0.006   | 0.310  | 0.022   | -0.204 | 0.139   | 0.123   | 0.375   |
|           | KLK10     | 0.381  | 0.007   | 0.231  | 0.092   | -0.094 | 0.498   | 0.134   | 0.335   |
|           | IL-19     | 0.366  | 0.010   | 0.072  | 0.604   | -0.275 | 0.044   | -0.099  | 0.476   |
|           | SERPINB3  | 0.338  | 0.017   | 0.293  | 0.032   | -0.193 | 0.161   | 0.104   | 0.456   |
|           | DCUN1D3   | 0.296  | 0.039   | 0.252  | 0.066   | -0.246 | 0.073   | 0.060   | 0.667   |
|           | CCL13     | 0.294  | 0.040   | 0.023  | 0.870   | -0.280 | 0.040   | -0.133  | 0.337   |
|           | CXCL1     | 0.129  | 0.378   | 0.301  | 0.027   | -0.245 | 0.074   | 0.124   | 0.372   |
|           | CYP2S1    | -0.010 | 0.945   | 0.282  | 0.039   | -0.160 | 0.248   | 0.142   | 0.304   |
|           | IL-17A    | 0.003  | 0.981   | 0.356  | 0.008   | -0.111 | 0.426   | 0.252   | 0.066   |
|           | IL-17F    | 0.068  | 0.642   | 0.283  | 0.038   | -0.205 | 0.137   | 0.119   | 0.392   |
|           | IL-36G    | 0.228  | 0.116   | 0.261  | 0.057   | -0.308 | 0.023   | 0.037   | 0.791   |
|           | KLK12     | 0.084  | 0.565   | 0.297  | 0.029   | 0.055  | 0.691   | 0.244   | 0.075   |
|           | PI3       | 0.156  | 0.285   | 0.439  | <0.001  | -0.161 | 0.244   | 0.257   | 0.060   |
|           | S100A12   | 0.149  | 0.307   | 0.320  | 0.018   | -0.281 | 0.040   | 0.082   | 0.557   |
|           | S100A7    | 0.135  | 0.356   | 0.253  | 0.065   | -0.279 | 0.041   | 0.017   | 0.905   |
|           | S100A7A   | 0.137  | 0.348   | 0.334  | 0.014   | -0.197 | 0.153   | 0.162   | 0.242   |
|           | S100A8    | 0.214  | 0.140   | 0.280  | 0.041   | -0.231 | 0.093   | 0.077   | 0.582   |
|           | S100A9    | 0.227  | 0.117   | 0.299  | 0.028   | -0.229 | 0.096   | 0.096   | 0.491   |
|           | SAA4      | 0.046  | 0.753   | 0.388  | 0.004   | -0.348 | 0.010   | 0.060   | 0.666   |
|           | SERPINB4  | 0.229  | 0.114   | 0.365  | 0.007   | -0.231 | 0.094   | 0.150   | 0.279   |
| VNN3      | 0.068     | 0.644  | 0.276   | 0.044  | -0.062  | 0.654  | 0.166   | 0.232   |         |

(continued)



Supplementary Table S3. Continued

|                          | Marker  | TEWL   |         | IASI-E |         | IASI-S |         | IASI-SE |         |
|--------------------------|---------|--------|---------|--------|---------|--------|---------|---------|---------|
|                          |         | rho    | P-Value | rho    | P-Value | rho    | P-Value | rho     | P-Value |
| Innate immunity          | IL-8    | 0.234  | 0.105   | 0.226  | 0.100   | -0.282 | 0.039   | 0.035   | 0.803   |
| Negative regulators      | IL-34   | -0.011 | 0.941   | -0.377 | 0.005   | 0.375  | 0.005   | -0.073  | 0.601   |
| Lipid metabolism         | ACER2   | -0.348 | 0.014   | -0.205 | 0.136   | 0.083  | 0.550   | -0.123  | 0.376   |
|                          | ACSL1   | 0.119  | 0.416   | -0.300 | 0.027   | 0.073  | 0.598   | -0.212  | 0.125   |
|                          | CeTP    | 0.334  | 0.019   | -0.321 | 0.018   | -0.404 | 0.002   | -0.500  | <0.001  |
|                          | FABP7   | -0.022 | 0.883   | -0.346 | 0.010   | -0.025 | 0.855   | -0.300  | 0.028   |
|                          | FFAR2   | 0.410  | 0.003   | -0.114 | 0.410   | -0.074 | 0.595   | -0.110  | 0.429   |
|                          | KRTDAP  | -0.344 | 0.016   | -0.202 | 0.143   | 0.035  | 0.803   | -0.169  | 0.221   |
|                          | LIPE    | 0.335  | 0.019   | -0.041 | 0.766   | -0.266 | 0.052   | -0.208  | 0.131   |
|                          | PLA2G16 | 0.279  | 0.052   | -0.207 | 0.134   | -0.240 | 0.080   | -0.314  | 0.021   |
|                          | PLA2G3  | 0.295  | 0.040   | 0.328  | 0.015   | -0.250 | 0.068   | 0.124   | 0.373   |
|                          | PLA2G4D | 0.378  | 0.007   | 0.353  | 0.009   | -0.151 | 0.277   | 0.178   | 0.198   |
|                          | SAA1    | 0.213  | 0.142   | 0.285  | 0.037   | -0.184 | 0.182   | 0.113   | 0.417   |
| Tight junctions          | CDH12   | -0.078 | 0.596   | 0.203  | 0.044   | -0.005 | 0.970   | -0.226  | 0.101   |
|                          | CDH19   | -0.145 | 0.320   | 0.030  | 0.829   | -0.388 | 0.004   | -0.105  | 0.452   |
|                          | CDH20   | -0.110 | 0.452   | -0.275 | 0.044   | 0.085  | 0.542   | -0.252  | 0.066   |
|                          | CLDN1   | -0.415 | 0.003   | -0.277 | 0.042   | -0.298 | 0.029   | -0.216  | 0.117   |
|                          | CLDN8   | -0.045 | 0.758   | -0.299 | 0.028   | -0.388 | 0.004   | -0.195  | 0.158   |
| Gap junctions            | GJB2    | 0.436  | 0.002   | 0.260  | 0.058   | -0.013 | 0.925   | 0.226   | 0.100   |
|                          | GJB6    | 0.457  | <0.001  | 0.202  | 0.143   | -0.145 | 0.294   | 0.072   | 0.605   |
| Keratins                 | K77     | -0.175 | 0.229   | -0.314 | 0.021   | 0.219  | 0.111   | -0.120  | 0.389   |
| Other barrier-related    | ANXA6   | 0.284  | 0.048   | -0.054 | 0.700   | -0.242 | 0.078   | -0.162  | 0.243   |
| KC differentiation       | IL-20   | 0.184  | 0.205   | 0.169  | 0.223   | -0.331 | 0.015   | -0.042  | 0.765   |
|                          | SPRR2A  | 0.085  | 0.560   | 0.285  | 0.037   | -0.162 | 0.243   | 0.150   | 0.278   |
|                          | SPRR2C  | 0.192  | 0.185   | 0.367  | 0.006   | -0.303 | 0.026   | 0.111   | 0.424   |
|                          | SPRR2F  | 0.163  | 0.262   | 0.287  | 0.035   | -0.193 | 0.161   | 0.130   | 0.349   |
| Terminal differentiation | FLG     | 0.034  | 0.816   | -0.296 | 0.030   | 0.157  | 0.257   | -0.175  | 0.206   |
|                          | LCE3D   | 0.306  | 0.033   | 0.163  | 0.238   | -0.288 | 0.034   | -0.124  | 0.371   |
|                          | LOR     | 0.038  | 0.798   | -0.291 | 0.033   | 0.225  | 0.102   | -0.067  | 0.630   |
|                          | SCEL    | -0.103 | 0.479   | -0.307 | 0.024   | 0.222  | 0.107   | -0.140  | 0.311   |
| Clinical indices         | IASI_E  | -0.095 | 0.515   | N/A    | N/A     | 0.043  | 0.758   | 0.765   | <0.001  |
|                          | IASI_S  | -0.266 | 0.064   | 0.043  | 0.758   | N/A    | N/A     | 0.650   | <0.001  |
|                          | IASI_SE | -0.257 | 0.075   | 0.765  | <0.001  | 0.650  | <0.001  | N/A     | N/A     |
|                          | TEWL    | N/A    | N/A     | -0.095 | 0.515   | -0.266 | 0.064   | -0.257  | 0.075   |
| Misc.                    | FURIN   | 0.467  | <0.001  | 0.143  | 0.302   | -0.080 | 0.565   | 0.073   | 0.600   |
|                          | GGT1    | 0.261  | 0.070   | 0.253  | 0.065   | -0.457 | <0.001  | -0.185  | 0.181   |
|                          | HIF1A   | 0.339  | 0.017   | 0.096  | 0.492   | -0.197 | 0.152   | 0.269   | 0.049   |
|                          | MPZL2   | 0.230  | 0.112   | 0.176  | 0.204   | -0.112 | 0.419   | 0.274   | 0.045   |
|                          | SLPI    | -0.099 | 0.499   | 0.377  | 0.005   | -0.153 | 0.268   | 0.208   | 0.131   |
|                          | SOX7    | 0.047  | 0.751   | 0.092  | 0.507   | 0.342  | 0.011   | 0.288   | 0.035   |

Pairs of rho and p-values found to be significant ( $P < 0.05$ ) have been highlighted in bold. Abbreviations: IASI-E, ichthyosis area severity index-erythema; IASI-S, ichthyosis area severity index-scaling; IASI-SE, total ichthyosis area severity index; KC, keratinocyte; LOR, loricrin; Misc., miscellaneous; N/A, not applicable; TEWL, transepidermal water loss; Th, T helper.

Supplementary Table S4. Selection of RNA-Seq Versus Flow Cytometry Spearman Correlations

| Gene Set                                            | RNA-Seq Marker | Flow Cytometry T-Cell Markers | Spearman Rho (r) | P-Value |
|-----------------------------------------------------|----------------|-------------------------------|------------------|---------|
| Th22 specific                                       | IL-22          | CD4+ IL-22+                   | 0.439            | 0.012   |
|                                                     | IL-22          | CD4+ IL-22+ CLA-              | 0.424            | 0.016   |
|                                                     | SERPINB4       | CD4+ IL-22+ CLA-              | 0.390            | 0.027   |
|                                                     | SERPINB4       | CD4+ IL-22+                   | 0.387            | 0.029   |
|                                                     | S100A9         | CD4+ IL-22+                   | 0.381            | 0.032   |
|                                                     | S100A8         | CD4+ IL-22+ CLA-              | 0.379            | 0.032   |
|                                                     | S100A8         | CD4+ IL-22+                   | 0.371            | 0.037   |
|                                                     | S100A8         | CD4+ IL-22+                   | 0.368            | 0.038   |
|                                                     | S100A9         | CD4+ IL-22+ CLA-              | 0.361            | 0.043   |
|                                                     | S100A9         | CD4+ IL-22+ CLA-              | 0.354            | 0.047   |
| Th17 specific                                       | K1             | CD4+ IL-17+ CLA-              | -0.375           | 0.034   |
|                                                     | IL-23A         | CD4+ IL-22+ CLA-              | 0.481            | 0.005   |
|                                                     | CAMP           | CD4+ IL-22+ CLA-              | 0.477            | 0.006   |
|                                                     | IL-23A         | CD4+ IL-22+                   | 0.465            | 0.007   |
|                                                     | CAMP           | CD4+ IL-22+                   | 0.459            | 0.008   |
|                                                     | CAMP           | CD4+ IL-17+ CLA-              | 0.368            | 0.038   |
|                                                     | PI3            | CD4+ IL-22+                   | 0.361            | 0.042   |
|                                                     | CAMP           | CD4+ IL-17+                   | 0.358            | 0.048   |
|                                                     | CCR6           | CD4+ IL-17+ CLA+              | -0.465           | 0.008   |
| Synergistically upregulated by IL-17/TNF- $\alpha$  | DCUN1D3        | CD4+ IL-22+                   | 0.525            | 0.002   |
|                                                     | DCUN1D3        | CD4+ IL-22+ CLA-              | 0.503            | 0.003   |
|                                                     | IL-23A         | CD4+ IL-22+ CLA-              | 0.481            | 0.005   |
|                                                     | FAM43A         | CD4+ IL-22+                   | 0.478            | 0.006   |
|                                                     | IL-23A         | CD4+ IL-22+                   | 0.465            | 0.007   |
|                                                     | FAM43A         | CD4+ IL-22+ CLA-              | 0.459            | 0.008   |
|                                                     | K75            | CD4+ IL-22+ CLA+              | 0.458            | 0.008   |
|                                                     | SPRR2A         | CD4+ IL-22+                   | 0.452            | 0.009   |
|                                                     | IL-1B          | CD4+ IL-22+                   | 0.448            | 0.010   |
|                                                     | IL-1B          | CD4+ IL-22+ CLA-              | 0.443            | 0.011   |
|                                                     | IL-1RN         | CD4+ IL-22+                   | 0.441            | 0.012   |
|                                                     | IL-1RN         | CD4+ IL-22+ CLA-              | 0.440            | 0.012   |
|                                                     | SERPINB3       | CD4+ IL-22+ CLA-              | 0.440            | 0.012   |
|                                                     | SPRR2A         | CD4+ IL-22+ CLA-              | 0.435            | 0.013   |
|                                                     | SERPINB3       | CD4+ IL-22+                   | 0.434            | 0.013   |
|                                                     | TMPRSS11D      | CD4+ IL-22+                   | 0.408            | 0.020   |
|                                                     | SERPINB3       | CD4+ IL-22+                   | 0.407            | 0.021   |
|                                                     | SPRR2D         | CD4+ IL-22+                   | 0.405            | 0.021   |
|                                                     | HBEGF          | CD4+ IL-22+ CLA+              | 0.403            | 0.022   |
|                                                     | TMPRSS11D      | CD4+ IL-22+ CLA-              | 0.401            | 0.023   |
| GSVA Pathway                                        |                | Flow Cytometry Markers        | Spearman Rho (r) | P-Value |
| Synergistic and additive IL-17 and TNF- $\alpha$ KC |                | CD4+ IL-22+                   | 0.420            | 0.017   |
| Synergistic and additive IL-17 and TNF- $\alpha$ KC |                | CD4+ IL-22+ CLA-              | 0.398            | 0.024   |
| Th22/IL-22                                          |                | CD4+ IL-22+                   | 0.388            | 0.028   |
| Th22/IL-22                                          |                | CD4+ IL-22+ CLA-              | 0.371            | 0.037   |
| Th17 specific                                       |                | CD4+ IL-22+                   | 0.361            | 0.043   |
| Th22/IL-22                                          |                | CD4+ IL-22+ CLA-              | 0.360            | 0.043   |
| Th2 specific                                        |                | CD4+ IL-22+                   | 0.356            | 0.045   |
| EDC                                                 |                | CD4+ IL-22+                   | 0.356            | 0.046   |

Abbreviations: CLA, cutaneous lymphocyte-associated antigen; EDC, epidermal differentiation complex; GSVA, gene set variation analysis; KC, keratinocyte; RNA-Seq, RNA-sequencing; Th, T helper.

## Supplementary Table S5. Pathway Enrichment Analysis of Differentially Expressed Genes in Ichthyosis Versus Controls

Canonical/KEGG/Reactome/BioCarta Pathways

| Term Name                                                                                                                 | Z-Score | P-Value | FDR    | Number of Genes Overlapped | Genes                                                                                                                                                                                                                                                                                                     |
|---------------------------------------------------------------------------------------------------------------------------|---------|---------|--------|----------------------------|-----------------------------------------------------------------------------------------------------------------------------------------------------------------------------------------------------------------------------------------------------------------------------------------------------------|
| Aurora B signaling                                                                                                        | 9.970   | <0.001  | <0.001 | 10.000                     | AURKA, AURKB, BIRC5, BUB1, KIF20A, KIF23, KIF2C, NCAPG, NCAPH, SMC4                                                                                                                                                                                                                                       |
| FOXO1 transcription factor network                                                                                        | 9.820   | <0.001  | <0.001 | 10.000                     | AURKB, BIRC5, CCNA2, CCNB1, CCNB2, CCNE1, CENPF, FOXM1, NEK2, PLK1                                                                                                                                                                                                                                        |
| Cell cycle, mitotic                                                                                                       | 7.350   | <0.001  | <0.001 | 26.000                     | AURKA, AURKB, BIRC5, BUB1, BUB1B, CCNA2, CCNB1, CCNB2, CCNE1, CDC20, CDC25A, CDC45, CDC6, ERCC6L, KIF18A, KIF20A, KIF23, KIF2C, MCM10, MYBL2, NEK2, PLK1, PTTG1, RRM2, SKA1, ZWINT                                                                                                                        |
| PLK1 signaling events                                                                                                     | 9.030   | <0.001  | <0.001 | 10.000                     | AURKA, BUB1, BUB1B, CCNB1, CDC20, CLSPN, ERCC6L, KIF20A, PLK1, TPX2                                                                                                                                                                                                                                       |
| Cell cycle                                                                                                                | 6.880   | <0.001  | <0.001 | 14.000                     | BUB1, BUB1B, CCNA2, CCNB1, CCNB2, CCNE1, CDC20, CDC25A, CDC45, CDC6, ESPL1, PLK1, PTTG1, TTK                                                                                                                                                                                                              |
| Cell cycle                                                                                                                | 6.140   | <0.001  | <0.001 | 27.000                     | AURKA, AURKB, BIRC5, BUB1, BUB1B, CCNA2, CCNB1, CCNB2, CCNE1, CDC20, CDC25A, CDC45, CDC6, ERCC6L, HJURP, KIF18A, KIF20A, KIF23, KIF2C, MCM10, MYBL2, NEK2, PLK1, PTTG1, RRM2, SKA1, ZWINT                                                                                                                 |
| DNA replication                                                                                                           | 6.350   | <0.001  | <0.001 | 17.000                     | AURKB, BIRC5, BUB1, BUB1B, CCNA2, CDC20, CDC45, CDC6, ERCC6L, KIF18A, KIF20A, KIF23, KIF2C, MCM10, PLK1, SKA1, ZWINT                                                                                                                                                                                      |
| Mitotic M-M/G1 phases                                                                                                     | 6.410   | <0.001  | <0.001 | 16.000                     | AURKB, BIRC5, BUB1, BUB1B, CDC20, CDC45, CDC6, ERCC6L, KIF18A, KIF20A, KIF23, KIF2C, MCM10, PLK1, SKA1, ZWINT                                                                                                                                                                                             |
| Ensemble of genes encoding ECM-associated proteins including ECM-affiliated proteins, ECM regulators and secreted factors | 5.530   | <0.001  | <0.001 | 38.000                     | A2ML1, CCL20, CCL7, CLEC3A, CLEC7A, CSTA, CXCL1, EREG, FGF1P1, HPSE, HRNR, HYAL4, IFNE, IL17A, IL17C, IL17F, IL20, IL36A, IL36G, IL36RN, LGALS9B, LGALS9C, LMAN1L, PCSK6, PI3, S100A12, S100A2, S100A7, S100A7A, S100A8, S100A9, SERPINB10, SERPINB13, SERPINB3, SERPINB4, TGM1, TLL2, WNT5A              |
| Mitotic prometaphase                                                                                                      | 6.650   | <0.001  | <0.001 | 11.000                     | AURKB, BIRC5, BUB1, BUB1B, CDC20, ERCC6L, KIF18A, KIF2C, PLK1, SKA1, ZWINT                                                                                                                                                                                                                                |
| Cyclin A/B1 associated events during G2/M transition                                                                      | 8.200   | <0.001  | <0.001 | 5.000                      | CCNA2, CCNB1, CCNB2, CDC25A, PLK1                                                                                                                                                                                                                                                                         |
| G1/s-specific transcription                                                                                               | 7.150   | <0.001  | <0.001 | 5.000                      | CCNE1, CDC25A, CDC45, CDC6, RRM2                                                                                                                                                                                                                                                                          |
| Genes encoding secreted soluble factors                                                                                   | 5.010   | <0.001  | <0.001 | 21.000                     | CCL20, CCL7, CXCL1, EREG, FGF1P1, HRNR, IFNE, IL17A, IL17C, IL17F, IL20, IL36A, IL36G, IL36RN, S100A12, S100A2, S100A7, S100A7A, S100A8, S100A9, WNT5A                                                                                                                                                    |
| E2F mediated regulation of DNA replication                                                                                | 6.020   | <0.001  | <0.001 | 6.000                      | CCNB1, CCNE1, CDC25A, CDC45, CDC6, RRM2                                                                                                                                                                                                                                                                   |
| Kinesins                                                                                                                  | 6.210   | <0.001  | <0.001 | 5.000                      | KIF18A, KIF20A, KIF23, KIF2C, KIF4A                                                                                                                                                                                                                                                                       |
| G0 and Early G1                                                                                                           | 6.060   | <0.001  | <0.001 | 5.000                      | CCNA2, CCNE1, CDC25A, CDC6, MYBL2                                                                                                                                                                                                                                                                         |
| G2/m checkpoints                                                                                                          | 5.330   | <0.001  | <0.001 | 6.000                      | CCNB1, CCNB2, CDC25A, CDC45, CDC6, MCM10                                                                                                                                                                                                                                                                  |
| Role of Ran in mitotic spindle regulation                                                                                 | 5.980   | <0.001  | <0.001 | 3.000                      | AURKA, KPNA2, TPX2                                                                                                                                                                                                                                                                                        |
| Aurora A signaling                                                                                                        | 5.280   | <0.001  | <0.001 | 5.000                      | AURKA, AURKB, BIRC5, DLGAP5, TPX2                                                                                                                                                                                                                                                                         |
| Regulation of mitotic cell cycle                                                                                          | 4.710   | <0.001  | <0.001 | 8.000                      | AURKA, AURKB, BUB1B, CCNA2, CCNB1, CDC20, PLK1, PTTG1                                                                                                                                                                                                                                                     |
| Ensemble of genes encoding ECM and ECM-associated proteins                                                                | 3.900   | <0.001  | 0.001  | 40.000                     | A2ML1, CCL20, CCL7, CLEC3A, CLEC7A, CSTA, CXCL1, EREG, FGF1P1, HPSE, HRNR, HYAL4, IFNE, IL17A, IL17C, IL17F, IL20, IL36A, IL36G, IL36RN, LGALS9B, LGALS9C, LMAN1L, LRG1, PCSK6, PI3, S100A12, S100A2, S100A7, S100A7A, S100A8, S100A9, SERPINB10, SERPINB13, SERPINB3, SERPINB4, TGM1, TLL2, VWA3A, WNT5A |
| ATR signaling pathway                                                                                                     | 4.510   | <0.001  | 0.001  | 5.000                      | CCNA2, CDC25A, CDC6, CLSPN, PLK1                                                                                                                                                                                                                                                                          |
| Oocyte meiosis                                                                                                            | 4.180   | <0.001  | 0.001  | 9.000                      | AURKA, BUB1, CCNB1, CCNB2, CCNE1, CDC20, ESPL1, PLK1, PTTG1                                                                                                                                                                                                                                               |

## Supplementary Table S5. Continued

Canonical/KEGG/Reactome/BioCarta Pathways

| Term Name                                                                                                | Z-Score | P-Value | FDR   | Number of Genes Overlapped | Genes                                                                                             |
|----------------------------------------------------------------------------------------------------------|---------|---------|-------|----------------------------|---------------------------------------------------------------------------------------------------|
| E2F transcription factor network                                                                         | 4.260   | <0.001  | 0.001 | 7.000                      | <i>CCNA2, CCNE1, CDC25A, CDC6, E2F7, MYBL2, RRM2</i>                                              |
| Chemokine receptors bind chemokines                                                                      | 4.340   | <0.001  | 0.001 | 6.000                      | <i>CCL20, CCL7, CXCL1, CXCR1, CXCR2, CXCR6</i>                                                    |
| Cell cycle checkpoints                                                                                   | 4.060   | <0.001  | 0.001 | 9.000                      | <i>BUB1B, CCNB1, CCNB2, CCNE1, CDC20, CDC25A, CDC45, CDC6, MCM10</i>                              |
| Amino acid transport across the plasma membrane                                                          | 4.050   | 0.001   | 0.002 | 4.000                      | <i>SLC6A14, SLC7A1, SLC7A11, SLC7A5</i>                                                           |
| G1/s transition                                                                                          | 3.630   | 0.001   | 0.003 | 8.000                      | <i>CCNA2, CCNB1, CCNE1, CDC25A, CDC45, CDC6, MCM10, RRM2</i>                                      |
| Mitotic G1-G1/S phases                                                                                   | 3.550   | 0.001   | 0.003 | 9.000                      | <i>CCNA2, CCNB1, CCNE1, CDC25A, CDC45, CDC6, MCM10, MYBL2, RRM2</i>                               |
| Glycosaminoglycan degradation                                                                            | 3.770   | 0.001   | 0.004 | 3.000                      | <i>HPSE, HS3ST3A1, HYAL4</i>                                                                      |
| Activation of ATR in response to replication stress                                                      | 3.640   | 0.001   | 0.004 | 4.000                      | <i>CDC25A, CDC45, CDC6, MCM10</i>                                                                 |
| IL-23-mediated signaling events                                                                          | 3.560   | 0.001   | 0.004 | 4.000                      | <i>ALOX12B, CXCL1, IL17A, IL17F</i>                                                               |
| Cyclins and Cell Cycle Regulation                                                                        | 3.540   | 0.002   | 0.005 | 3.000                      | <i>CCNB1, CCNE1, CDC25A</i>                                                                       |
| Cell cycle: g2/m checkpoint                                                                              | 3.430   | 0.002   | 0.006 | 3.000                      | <i>CCNB1, CDC25A, PLK1</i>                                                                        |
| Mitotic G2-G2/M phases                                                                                   | 3.230   | 0.002   | 0.006 | 6.000                      | <i>CCNA2, CCNB1, CCNB2, CDC25A, NEK2, PLK1</i>                                                    |
| APC-Cdc20 mediated degradation of Nek2A                                                                  | 3.330   | 0.002   | 0.007 | 3.000                      | <i>BUB1B, CDC20, NEK2</i>                                                                         |
| Glycosphingolipid biosynthesis - lacto and neolacto series                                               | 3.240   | 0.002   | 0.007 | 3.000                      | <i>FUT2, FUT3, FUT6</i>                                                                           |
| Genes encoding enzymes and their regulators involved in the remodeling of the ECM                        | 3.010   | 0.002   | 0.007 | 12.000                     | <i>A2ML1, CSTA, HPSE, HYAL4, PCSK6, PI3, SERPINB10, SERPINB13, SERPINB3, SERPINB4, TGM1, TLL2</i> |
| Amine compound SLC transporters                                                                          | 3.150   | 0.003   | 0.008 | 3.000                      | <i>RHCG, SLC6A11, SLC6A14</i>                                                                     |
| Progesterone-mediated oocyte maturation                                                                  | 3.050   | 0.003   | 0.008 | 6.000                      | <i>BUB1, CCNA2, CCNB1, CCNB2, CDC25A, PLK1</i>                                                    |
| Linoleic acid metabolism                                                                                 | 2.980   | 0.004   | 0.010 | 3.000                      | <i>AKR1B10, PLA2G4B, PLA2G4E</i>                                                                  |
| G alpha (i) signaling events                                                                             | 2.840   | 0.004   | 0.010 | 10.000                     | <i>CCL20, CXCL1, CXCR1, CXCR2, CXCR6, GNAT1, GNAT2, HRH3, MTNR1B, RGS20</i>                       |
| P53 signaling pathway                                                                                    | 2.890   | 0.004   | 0.010 | 5.000                      | <i>CCNB1, CCNB2, CCNE1, GTSE1, RRM2</i>                                                           |
| APC/C:Cdh1 mediated degradation of Cdc20 and other APC/C:Cdh1 targeted proteins in late mitosis/early G1 | 2.890   | 0.004   | 0.010 | 5.000                      | <i>AURKA, AURKB, CDC20, PLK1, PTTG1</i>                                                           |
| Amino acid and oligopeptide SLC transporters                                                             | 2.840   | 0.004   | 0.011 | 4.000                      | <i>SLC6A14, SLC7A1, SLC7A11, SLC7A5</i>                                                           |
| Activation of the pre-replicative complex                                                                | 2.830   | 0.005   | 0.011 | 3.000                      | <i>CDC45, CDC6, MCM10</i>                                                                         |
| ABC-family proteins mediated transport                                                                   | 2.630   | 0.006   | 0.016 | 3.000                      | <i>ABCA12, ABCC1, ABCG4</i>                                                                       |
| Ion channel transport                                                                                    | 2.600   | 0.007   | 0.016 | 4.000                      | <i>ATP10B, ATP12A, HTR3A, HTR3B</i>                                                               |
| G alpha i Pathway                                                                                        | 2.560   | 0.007   | 0.017 | 3.000                      | <i>EPHB2, PI3, RGS20</i>                                                                          |
| P73 transcription factor network                                                                         | 2.500   | 0.008   | 0.018 | 5.000                      | <i>BUB1, CCNA2, CCNB1, PLK1, S100A2</i>                                                           |
| Validated transcriptional targets of AP1 family members Fra1 and Fra2                                    | 2.440   | 0.009   | 0.019 | 3.000                      | <i>CCNA2, FOSL1, IVL</i>                                                                          |

(continued)

## Supplementary Table S5. Continued

Canonical/KEGG/Reactome/BioCarta Pathways

| Term Name                                                                                           | Z-Score | P-Value | FDR   | Number of Genes Overlapped | Genes                                                                                                       |
|-----------------------------------------------------------------------------------------------------|---------|---------|-------|----------------------------|-------------------------------------------------------------------------------------------------------------|
| Glycosphingolipid metabolism                                                                        | 2.440   | 0.009   | 0.019 | 3.000                      | ARSF, GM2A, NEU2                                                                                            |
| Arachidonic acid metabolism                                                                         | 2.430   | 0.009   | 0.019 | 4.000                      | ALOX12B, GPX2, PLA2G4B, PLA2G4E                                                                             |
| NOD-like receptor signaling pathway                                                                 | 2.280   | 0.012   | 0.025 | 4.000                      | GARD6, CCL7, CXCL1, PYDC1                                                                                   |
| Interferon gamma signaling                                                                          | 2.280   | 0.012   | 0.025 | 4.000                      | GBP6, OAS2, OAS3, OASL                                                                                      |
| Retinol metabolism                                                                                  | 2.200   | 0.013   | 0.027 | 4.000                      | ADH7, RDH16, UGT1A10, UGT1A7                                                                                |
| IFN- $\alpha/\beta$ signaling                                                                       | 2.200   | 0.013   | 0.027 | 4.000                      | IFI27, OAS2, OAS3, OASL                                                                                     |
| Cytokine-cytokine receptor interaction                                                              | 2.170   | 0.015   | 0.030 | 11.000                     | CCL20, CCL7, CXCL1, CXCR1, CXCR2, CXCR6, IFNE, IL17A, IL20, TNFRSF21, TNFRSF9                               |
| MHC class II antigen presentation                                                                   | 2.140   | 0.015   | 0.030 | 5.000                      | KIF18A, KIF20A, KIF23, KIF2C, KIF4A                                                                         |
| ABC transporters                                                                                    | 2.080   | 0.016   | 0.030 | 3.000                      | ABCA12, ABCC1, ABCG4                                                                                        |
| APC/C:Cdc20 mediated degradation of mitotic proteins                                                | 2.030   | 0.018   | 0.034 | 4.000                      | BUB1B, CCNB1, CDC20, PTTG1                                                                                  |
| Metabolism of xenobiotics by cytochrome P450                                                        | 2.000   | 0.019   | 0.035 | 4.000                      | ADH7, CYP2S1, UGT1A10, UGT1A7                                                                               |
| Validated transcriptional targets of delta $\alpha$ 63 isoforms                                     | 1.950   | 0.020   | 0.036 | 3.000                      | CCNB2, GPX2, TOP2A                                                                                          |
| Drug metabolism - other enzymes                                                                     | 1.790   | 0.026   | 0.046 | 3.000                      | UGT1A10, UGT1A7, XDH                                                                                        |
| Heparan sulfate/heparin (HS-GAG) metabolism                                                         | 1.750   | 0.028   | 0.049 | 3.000                      | B3GAT1, HPSE, HS3ST3A1                                                                                      |
| Validated targets of C-MYC transcriptional activation                                               | 1.730   | 0.030   | 0.053 | 4.000                      | BIRC5, CCNB1, CDC25A, FOSL1                                                                                 |
| S phase                                                                                             | 1.740   | 0.031   | 0.053 | 5.000                      | CCNA2, CCNE1, CDC25A, CDC45, CDC6                                                                           |
| Validated transcriptional targets of tap63 isoforms                                                 | 1.680   | 0.031   | 0.053 | 3.000                      | GPX2, PLK1, S100A2                                                                                          |
| Glycosaminoglycan metabolism                                                                        | 1.700   | 0.034   | 0.056 | 5.000                      | B3GAT1, HAS3, HMMR, HPSE, HS3ST3A1                                                                          |
| Transmembrane transport of small molecules                                                          | 1.700   | 0.038   | 0.063 | 14.000                     | ABCA12, ABCC1, ABCG4, ATP10B, ATP12A, HTR3A, HTR3B, RHCG, SLC5A1, SLC6A11, SLC6A14, SLC7A1, SLC7A11, SLC7A5 |
| Transport of glucose and other sugars, bile salts and organic acids, metal ions and amine compounds | 1.470   | 0.047   | 0.076 | 4.000                      | RHCG, SLC5A1, SLC6A11, SLC6A14                                                                              |
| Cyclin E associated events during G1/S transition                                                   | 1.380   | 0.050   | 0.080 | 3.000                      | CCNA2, CCNE1, CDC25A                                                                                        |
| Transport of inorganic cations/anions and amino acids/oligopeptides                                 | 1.380   | 0.055   | 0.085 | 4.000                      | SLC6A14, SLC7A1, SLC7A11, SLC7A5                                                                            |
| Immunoregulatory interactions between a Lymphoid and a non-Lymphoid cell                            | 1.320   | 0.055   | 0.085 | 3.000                      | RAET1E, ULBP1, ULBP2                                                                                        |
| Recruitment of mitotic centrosome proteins and complexes                                            | 1.320   | 0.055   | 0.085 | 3.000                      | CCNB1, NEK2, PLK1                                                                                           |
| IFN signaling                                                                                       | 1.370   | 0.061   | 0.091 | 6.000                      | GBP6, IFI27, KPNA2, OAS2, OAS3, OASL                                                                        |
| Sphingolipid metabolism                                                                             | 1.270   | 0.061   | 0.091 | 3.000                      | ARSF, GM2A, NEU2                                                                                            |
| Epithelial cell signaling in <i>Helicobacter pylori</i> infection                                   | 1.240   | 0.063   | 0.093 | 3.000                      | CXCL1, CXCR1, CXCR2                                                                                         |

**Supplementary Table S5. Continued**  
Canonical/KEGG/Reactome/BioCarta Pathways

| Term Name                                                                              | Z-Score | P-Value | FDR   | Number of Genes Overlapped | Genes                                                                                                                          |
|----------------------------------------------------------------------------------------|---------|---------|-------|----------------------------|--------------------------------------------------------------------------------------------------------------------------------|
| Potassium channels                                                                     | 1.270   | 0.066   | 0.095 | 4.000                      | KCNG3, KCNJ15, KCNK10, KCNK6                                                                                                   |
| Phase 1 - functionalization of compounds                                               | 1.210   | 0.066   | 0.095 | 3.000                      | ADH7, CYP24A1, CYP2S1                                                                                                          |
| Factors involved in megakaryocyte development and platelet production                  | 1.280   | 0.068   | 0.097 | 5.000                      | KIF18A, KIF20A, KIF23, KIF2C, KIF4A                                                                                            |
| Drug metabolism - cytochrome P450                                                      | 1.130   | 0.075   | 0.100 | 3.000                      | ADH7, UGT1A10, UGT1A7                                                                                                          |
| Metabolism of nucleotides                                                              | 1.130   | 0.075   | 0.100 | 3.000                      | GDA, RRM2, XDH                                                                                                                 |
| Natural killer cell mediated cytotoxicity                                              | 1.150   | 0.083   | 0.110 | 5.000                      | RAET1E, RAET1G, RAET1L, ULBP1, ULBP2                                                                                           |
| M/g1 transition                                                                        | 0.940   | 0.100   | 0.140 | 3.000                      | CDC45, CDC6, MCM10                                                                                                             |
| Peptide ligand-binding receptors                                                       | 0.964   | 0.120   | 0.160 | 6.000                      | CCL20, CCL7, CXCL1, CXCR1, CXCR2, CXCR6                                                                                        |
| Class A/1 (Rhodopsin-like receptors)                                                   | 0.954   | 0.130   | 0.170 | 9.000                      | CCL20, CCL7, CXCL1, CXCR1, CXCR2, CXCR6, HRH3, MTNR1B, P2RY1                                                                   |
| Chemokine signaling pathway                                                            | 0.896   | 0.130   | 0.170 | 6.000                      | CCL20, CCL7, CXCL1, CXCR1, CXCR2, CXCR6                                                                                        |
| Synthesis of DNA                                                                       | 0.707   | 0.140   | 0.180 | 3.000                      | CCNA2, CDC45, CDC6                                                                                                             |
| SLC-mediated transmembrane transport                                                   | 0.752   | 0.160   | 0.210 | 7.000                      | RHCG, SLC5A1, SLC6A11, SLC6A14, SLC7A1, SLC7A11, SLC7A5                                                                        |
| Fc g R-mediated phagocytosis                                                           | 0.611   | 0.160   | 0.210 | 3.000                      | PLA2G4B, PLA2G4D, PLA2G4E                                                                                                      |
| GPCR ligand binding                                                                    | 0.749   | 0.180   | 0.220 | 11.000                     | ADM2, CCL20, CCL7, CXCL1, CXCR1, CXCR2, CXCR6, HRH3, MTNR1B, P2RY1, WNT5A                                                      |
| Genes encoding proteins affiliated structurally or functionally to ECM proteins        | 0.639   | 0.180   | 0.220 | 5.000                      | CLEC3A, CLEC7A, LGALS9B, LGALS9C, LMAN1L                                                                                       |
| Biological oxidations                                                                  | 0.568   | 0.190   | 0.230 | 4.000                      | ADH7, CYP24A1, CYP2S1, UGT1A7                                                                                                  |
| Vascular smooth muscle contraction                                                     | 0.291   | 0.250   | 0.300 | 3.000                      | MYLK2, PLA2G4B, PLA2G4E                                                                                                        |
| Phospholipid metabolism                                                                | 0.338   | 0.260   | 0.310 | 5.000                      | ARSF, GM2A, NEU2, PLA2G4D, PLBD1                                                                                               |
| Neuronal system                                                                        | 0.372   | 0.270   | 0.320 | 7.000                      | CHRNA5, CHRNA9, KCNG3, KCNJ15, KCNK10, KCNK6, SLC6A11                                                                          |
| Purine metabolism                                                                      | 0.263   | 0.280   | 0.320 | 4.000                      | GDA, POLR3G, RRM2, XDH                                                                                                         |
| Metabolism of carbohydrates                                                            | 0.307   | 0.280   | 0.330 | 6.000                      | B3GAT1, HAS3, HMMR, HPSE, HS3ST3A1, SLC5A1                                                                                     |
| Neurotransmitter receptor binding and downstream transmission in the postsynaptic cell | 0.008   | 0.350   | 0.400 | 3.000                      | CHRNA5, CHRNA9, KCNJ15                                                                                                         |
| Cytokine signaling in immune system                                                    | 0.030   | 0.380   | 0.430 | 6.000                      | GBP6, IFI27, KPNA2, OAS2, OAS3, OASL                                                                                           |
| Transmission across chemical synapses                                                  | -0.036  | 0.390   | 0.430 | 4.000                      | CHRNA5, CHRNA9, KCNJ15, SLC6A11                                                                                                |
| Metabolism of amino acids and derivatives                                              | -0.175  | 0.440   | 0.490 | 4.000                      | AASS, ARG1, HAL, KYNU                                                                                                          |
| Hemostasis                                                                             | -0.369  | 0.560   | 0.620 | 9.000                      | KIF18A, KIF20A, KIF23, KIF2C, KIF4A, LRP8, P2RY1, SLC7A11, SLC7A5                                                              |
| Neuroactive ligand-receptor interaction                                                | -0.426  | 0.560   | 0.620 | 5.000                      | CHRNA5, CHRNA9, HRH3, MTNR1B, P2RY1                                                                                            |
| Immune system                                                                          | -0.517  | 0.650   | 0.700 | 18.000                     | CDC20, DEFB4A, GBP6, IFI27, KIF18A, KIF20A, KIF23, KIF2C, KIF4A, KPNA2, NLRX1, OAS2, OAS3, OASL, RAET1E, S100A12, ULBP1, ULBP2 |
| Adaptive immune system                                                                 | -0.794  | 0.730   | 0.790 | 9.000                      | CDC20, KIF18A, KIF20A, KIF23, KIF2C, KIF4A, RAET1E, ULBP1, ULBP2                                                               |
| Axon guidance                                                                          | -1.050  | 0.790   | 0.840 | 3.000                      | CDK5R1, KIF4A, SCN2A                                                                                                           |

(continued)



## Supplementary Table S5. Continued

Canonical/KEGG/Reactome/BioCarta Pathways

| Term Name                                          | Z-Score | P-Value | FDR    | Number of Genes Overlapped | Genes                                                                                                                                                                                                                                                                                                                                                                                                                                                                |
|----------------------------------------------------|---------|---------|--------|----------------------------|----------------------------------------------------------------------------------------------------------------------------------------------------------------------------------------------------------------------------------------------------------------------------------------------------------------------------------------------------------------------------------------------------------------------------------------------------------------------|
| Metabolism of lipids and lipoproteins              | -1.110  | 0.830   | 0.870  | 7.000                      | ARSF, CYP24A1, GM2A, NEU2, PLA2G4D, PLBD1, TNFRSF21                                                                                                                                                                                                                                                                                                                                                                                                                  |
| Innate immune system                               | -1.260  | 0.860   | 0.900  | 3.000                      | DEFB4A, NLRX1, S100A12                                                                                                                                                                                                                                                                                                                                                                                                                                               |
| Developmental biology                              | -1.260  | 0.870   | 0.900  | 5.000                      | CDK5R1, HNF1B, KIF4A, PCSK6, SCN2A                                                                                                                                                                                                                                                                                                                                                                                                                                   |
| GPCR downstream signaling                          | -1.410  | 0.910   | 0.930  | 12.000                     | ADM2, CCL20, CXCL1, CXCR1, CXCR2, CXCR6, GNAT1, GNAT2, HRH3, MTNR1B, P2RY1, RGS20                                                                                                                                                                                                                                                                                                                                                                                    |
| Signaling by GPCR                                  | -1.440  | 0.910   | 0.930  | 14.000                     | ADM2, CCL20, CCL7, CXCL1, CXCR1, CXCR2, CXCR6, GNAT1, GNAT2, HRH3, MTNR1B, P2RY1, RGS20, WNT5A                                                                                                                                                                                                                                                                                                                                                                       |
| Pathways in cancer                                 | -1.610  | 0.930   | 0.940  | 3.000                      | BIRC5, CCNE1, WNT5A                                                                                                                                                                                                                                                                                                                                                                                                                                                  |
| Metabolism of proteins                             | -2.500  | 1.000   | 1.000  | 3.000                      | ARSF, GCNT4, TUBA1C                                                                                                                                                                                                                                                                                                                                                                                                                                                  |
| Gene Ontology by cellular components               |         |         |        |                            |                                                                                                                                                                                                                                                                                                                                                                                                                                                                      |
| Cornified envelope                                 | 16.200  | <0.001  | <0.001 | 19.000                     | CNFN, CSTA, HRNR, IVL, LCE3A, LCE3C, LCE3D, LCE3E, PI3, SPRR1A, SPRR1B, SPRR2A, SPRR2B, SPRR2D, SPRR2E, SPRR2F, SPRR2G, SPRR3, TGM1                                                                                                                                                                                                                                                                                                                                  |
| Kinetochores                                       | 7.550   | <0.001  | <0.001 | 11.000                     | AURKB, BUB1, BUB1B, CENPF, KIF18A, KIF2C, NEK2, PLK1, SKA3, TTK, ZWINT                                                                                                                                                                                                                                                                                                                                                                                               |
| Condensed chromosome outer kinetochores            | 9.980   | <0.001  | <0.001 | 4.000                      | BUB1B, CENPF, SKA1, SKA3                                                                                                                                                                                                                                                                                                                                                                                                                                             |
| Spindle microtubule                                | 7.870   | <0.001  | <0.001 | 7.000                      | AURKA, AURKB, BIRC5, KIF4A, PLK1, SKA1, SKA3                                                                                                                                                                                                                                                                                                                                                                                                                         |
| Midbody                                            | 6.580   | <0.001  | <0.001 | 14.000                     | ANLN, ASPM, AURKA, AURKB, BIRC5, CENPF, CEP55, KIF14, KIF20A, KIF23, KIF4A, NEK2, PLK1, SHCBP1                                                                                                                                                                                                                                                                                                                                                                       |
| Spindle                                            | 6.580   | <0.001  | <0.001 | 12.000                     | AURKA, AURKB, BUB1B, CDC20, CENPF, KBTBD8, KIF20A, KIF23, PLK1, SHCBP1, TPX2, TTK                                                                                                                                                                                                                                                                                                                                                                                    |
| Kinesin complex                                    | 7.150   | <0.001  | <0.001 | 8.000                      | KIF14, KIF18A, KIF18B, KIF20A, KIF23, KIF24, KIF2C, KIF4A                                                                                                                                                                                                                                                                                                                                                                                                            |
| Chromosome passenger complex                       | 9.530   | <0.001  | <0.001 | 3.000                      | AURKA, AURKB, BIRC5                                                                                                                                                                                                                                                                                                                                                                                                                                                  |
| Extracellular region                               | 4.900   | <0.001  | <0.001 | 63.000                     | ADH7, ADM2, AKR1B10, ARG1, B3GAT1, C10orf99, CCL20, CHI3L2, CXCL1, DEFB4A, ENDOU, EPHB2, EREG, FABP5, FETUB, FGF2, GM2A, HPSE, HRNR, IGLON5, IL17A, IL17C, IL17F, IL20, IL36A, IL36G, IL36RN, KLK10, KLK13, KLK8, KLK9, LCN2, LRG1, LRP8, PCSK6, PCSK9, PGLYRP2, PGLYRP3, PI3, PLA2G4B, PRSS22, PRSS27, RAET1E, RAET1G, RAET1L, S100A12, S100A7, S100A8, S100A9, SAA4, SERPINB3, SUS4, TCN1, TEX101, TLL2, TMPS11A, TMPS11D, ULBP2, VNN1, VNN3, VWA3A, WFDC12, WNT5A |
| Condensin complex                                  | 7.950   | <0.001  | <0.001 | 3.000                      | NCAPG, NCAPH, SMC4                                                                                                                                                                                                                                                                                                                                                                                                                                                   |
| Spindle midzone                                    | 6.650   | <0.001  | <0.001 | 5.000                      | AURKA, AURKB, CDC6, KIF14, PLK1                                                                                                                                                                                                                                                                                                                                                                                                                                      |
| Spindle pole                                       | 5.260   | <0.001  | <0.001 | 10.000                     | AUNIP, CCNB1, CDC20, CDC6, CENPF, CKAP2L, FAM110C, NEK2, PLK1, TPX2                                                                                                                                                                                                                                                                                                                                                                                                  |
| Anchored component of plasma membrane              | 5.940   | <0.001  | <0.001 | 5.000                      | PRSS22, PRSS27, TEX101, ULBP1, ULBP2                                                                                                                                                                                                                                                                                                                                                                                                                                 |
| Condensed chromosome kinetochores                  | 4.920   | <0.001  | <0.001 | 8.000                      | BIRC5, BUB1, BUB1B, ERCC6L, HJURP, KIF2C, NEK2, ZWINT                                                                                                                                                                                                                                                                                                                                                                                                                |
| Mitotic spindle midzone                            | 5.610   | <0.001  | <0.001 | 3.000                      | AURKB, KIF18A, KIF18B                                                                                                                                                                                                                                                                                                                                                                                                                                                |
| Spindle pole centrosome                            | 5.360   | <0.001  | 0.001  | 3.000                      | AURKA, AURKB, DLGAP5                                                                                                                                                                                                                                                                                                                                                                                                                                                 |
| Centrosome                                         | 4.080   | <0.001  | 0.001  | 21.000                     | ASPM, AUNIP, AURKA, CAMK2N2, CCNB1, CCNB2, CCNE1, CDC20, CDC45, CDKL5, CENPF, CEP55, CKAP2L, ESPL1, HMMR, IVL, KIF23, KIF2C, NEK2, PLK1, STIL                                                                                                                                                                                                                                                                                                                        |
| Specific granule lumen                             | 4.510   | <0.001  | 0.001  | 6.000                      | ARG1, CXCL1, HPSE, LCN2, LRG1, TCN1                                                                                                                                                                                                                                                                                                                                                                                                                                  |
| Cyclin-dependent protein kinase holoenzyme complex | 4.710   | <0.001  | 0.001  | 4.000                      | CCNA2, CCNB1, CCNB2, CCNE1                                                                                                                                                                                                                                                                                                                                                                                                                                           |



Supplementary Table S5. Continued

Canonical/KEGG/Reactome/BioCarta Pathways

| Term Name                                   | Z-Score | P-Value | FDR   | Number of Genes Overlapped | Genes                                                                                                                                                                                                                                                                                                                                                                                             |
|---------------------------------------------|---------|---------|-------|----------------------------|---------------------------------------------------------------------------------------------------------------------------------------------------------------------------------------------------------------------------------------------------------------------------------------------------------------------------------------------------------------------------------------------------|
| Extracellular space                         | 3.610   | <0.001  | 0.001 | 53.000                     | A2ML1, ACPP, ARG1, C10orf99, CCL20, CCL7, CHI3L2, CLEC3A, CSTA, CXCL1, DEFB4A, ENDOU, EREG, FGFBP1, IFNE, IGFL1, IL17A, IL17C, IL17F, IL20, IL36A, IL36G, IL36RN, INA, KLK13, KLK8, LCN2, LRG1, OAS3, PCSK6, PCSK9, PGLYRP2, PGLYRP3, PGLYRP4, PLBD1, RAET1E, RAET1G, RAET1L, S100A7, S100A8, S100A9, SAA2, SAA4, SEMG2, SERPINB10, SERPINB13, SERPINB3, SERPINB4, TCN1, ULBP1, ULBP2, WNT5A, XDH |
| Microtubule cytoskeleton                    | 3.780   | <0.001  | 0.002 | 9.000                      | AURKA, CCNB2, HMMR, KIF18A, KIF2C, PLK1, SKA1, TPX2, TUBA1C                                                                                                                                                                                                                                                                                                                                       |
| Intercellular bridge                        | 3.720   | 0.001   | 0.003 | 5.000                      | CEP55, KIF20A, KIF23, KIF4A, TPX2                                                                                                                                                                                                                                                                                                                                                                 |
| Extrinsic component of plasma membrane      | 3.520   | 0.002   | 0.006 | 3.000                      | NLRP10, PRSS22, PRSS27                                                                                                                                                                                                                                                                                                                                                                            |
| Condensed chromosome                        | 3.520   | 0.002   | 0.006 | 3.000                      | MKI67, NCAPG, TOP2A                                                                                                                                                                                                                                                                                                                                                                               |
| Azurophil granule lumen                     | 3.300   | 0.002   | 0.006 | 6.000                      | ARG1, FABP5, GM2A, HRNR, S100A7, SERPINB3                                                                                                                                                                                                                                                                                                                                                         |
| Flemming body                               | 3.430   | 0.002   | 0.006 | 3.000                      | CEP55, KIF14, KIF23                                                                                                                                                                                                                                                                                                                                                                               |
| Microtubule                                 | 3.030   | 0.002   | 0.008 | 13.000                     | CDK5R1, FAM110C, KIF14, KIF18A, KIF18B, KIF20A, KIF23, KIF24, KIF2C, KIF4A, NEK2, TPX2, TUBA1C                                                                                                                                                                                                                                                                                                    |
| Chromosome, centromeric region              | 2.930   | 0.004   | 0.012 | 4.000                      | BIRC5, CENPF, HJURP, KIF2C                                                                                                                                                                                                                                                                                                                                                                        |
| Secretory granule                           | 2.670   | 0.006   | 0.017 | 5.000                      | KLK10, KLK13, KLK8, KLK9, TMPRSS4                                                                                                                                                                                                                                                                                                                                                                 |
| Integral component of presynaptic membrane  | 2.680   | 0.006   | 0.017 | 4.000                      | EPHB2, HTR3A, SCN2A, SLC6A11                                                                                                                                                                                                                                                                                                                                                                      |
| Secretory granule membrane                  | 2.360   | 0.010   | 0.027 | 5.000                      | CD177, CXCR1, CXCR2, FABP5, SERPINB10                                                                                                                                                                                                                                                                                                                                                             |
| Mitotic spindle                             | 2.350   | 0.010   | 0.027 | 4.000                      | CKAP2L, ESPL1, KIF23, TPX2                                                                                                                                                                                                                                                                                                                                                                        |
| Integral component of postsynaptic membrane | 2.350   | 0.010   | 0.027 | 3.000                      | EPHB2, HTR3A, SLC6A11                                                                                                                                                                                                                                                                                                                                                                             |
| Microtubule organizing center               | 2.350   | 0.011   | 0.027 | 7.000                      | BUB1B, CEP55, DLGAP5, FAM110C, KIF18A, TCTEX1D4, TPX2                                                                                                                                                                                                                                                                                                                                             |
| Anchored component of membrane              | 2.260   | 0.012   | 0.031 | 5.000                      | CD177, RAET1G, RAET1L, VNN1, VNN3                                                                                                                                                                                                                                                                                                                                                                 |
| Centriole                                   | 2.180   | 0.014   | 0.035 | 6.000                      | AURKA, CEP55, KIF24, PLK1, STIL, TOP2A                                                                                                                                                                                                                                                                                                                                                            |
| Cleavage furrow                             | 1.940   | 0.020   | 0.047 | 3.000                      | CEP55, HTR3A, KIF20A                                                                                                                                                                                                                                                                                                                                                                              |
| Tertiary granule lumen                      | 1.940   | 0.020   | 0.047 | 3.000                      | CXCL1, LRG1, TCN1                                                                                                                                                                                                                                                                                                                                                                                 |
| Photoreceptor outer segment                 | 1.870   | 0.023   | 0.051 | 3.000                      | CNGB1, GNAT1, GNAT2                                                                                                                                                                                                                                                                                                                                                                               |
| Voltage-gated potassium channel complex     | 1.860   | 0.025   | 0.054 | 4.000                      | CNTNAP2, KCNG3, KCNK6, LRRC55                                                                                                                                                                                                                                                                                                                                                                     |
| Rough endoplasmic reticulum                 | 1.800   | 0.025   | 0.055 | 3.000                      | PCSK9, SLC7A11, ZC3H12A                                                                                                                                                                                                                                                                                                                                                                           |
| Axoneme                                     | 1.730   | 0.030   | 0.064 | 4.000                      | CCDC63, CENPF, TCTEX1D4, WDR66                                                                                                                                                                                                                                                                                                                                                                    |
| Apical plasma membrane                      | 1.360   | 0.067   | 0.140 | 9.000                      | ASPM, GJB6, GM2A, GNAT1, P2RY1, RHCG, SLC22A13, SLC5A1, SLC7A5                                                                                                                                                                                                                                                                                                                                    |
| Basolateral plasma membrane                 | 1.270   | 0.072   | 0.140 | 6.000                      | ABCC1, ATP12A, GM2A, NDRG4, P2RY1, RHCG                                                                                                                                                                                                                                                                                                                                                           |
| Postsynapse                                 | 1.130   | 0.075   | 0.150 | 3.000                      | EPHB2, INA, WNT5A                                                                                                                                                                                                                                                                                                                                                                                 |
| Neuron projection                           | 1.260   | 0.079   | 0.150 | 9.000                      | ARG1, CDK5R1, CHRNA5, CHRNA9, EPHB2, FOSL1, HTR3A, HTR3B, SLC6A11                                                                                                                                                                                                                                                                                                                                 |
| Intracellular membrane-bounded organelle    | 1.290   | 0.080   | 0.150 | 17.000                     | AASS, ABCA12, B3GAT1, CDK5R1, CLEC7A, CYP2S1, GPR1, HPSE, LRG1, NEU2, OAS2, OAS3, RDH16, SAMD9, SLC7A5, UGT1A10, UGT1A7                                                                                                                                                                                                                                                                           |
| Integral component of plasma membrane       | 1.250   | 0.091   | 0.160 | 32.000                     | ABCC1, CHRNA5, CHRNA9, CXCR2, CXCR6, EPHB2, EREG, GPR1, GPR15, HAS3, HRH3, HTR3A, HTR3B, KCNJ15, KCNK10, KCNK6, LRRC55, MFSD2B, MTNR1B, NPR3, P2RY1, RHCG, SCN2A, SLC16A6, SLC22A13, SLC5A1, SLC7A1, TMPRSS11A, TMPRSS11D, TNFRSF21, TNFRSF9, TPBG                                                                                                                                                |

(continued)

**Supplementary Table S5. Continued**  
Canonical/KEGG/Reactome/BioCarta Pathways

| Term Name                        | Z-Score | P-Value | FDR   | Number of Genes Overlapped | Genes                                                                                                                                                                                                                                                                                                      |
|----------------------------------|---------|---------|-------|----------------------------|------------------------------------------------------------------------------------------------------------------------------------------------------------------------------------------------------------------------------------------------------------------------------------------------------------|
| Perinuclear region of cytoplasm  | 1.210   | 0.092   | 0.160 | 17.000                     | AURKA, BUB1B, CDC20, CDK5R1, CDKL5, CDKN3, CENPF, GDPD3, GJB2, HRNR, OAS2, OFCC1, PCSK9, SERINC5, SPRR3, SYT5, ZDHHC20                                                                                                                                                                                     |
| Golgi cisterna membrane          | 0.985   | 0.094   | 0.160 | 3.000                      | FUT2, FUT3, FUT6                                                                                                                                                                                                                                                                                           |
| Axon                             | 1.120   | 0.096   | 0.160 | 8.000                      | CDK5R1, CNTNAP2, EPHB2, HTR3A, LRP8, SCN2A, SYT5, TNFRSF21                                                                                                                                                                                                                                                 |
| Cell surface                     | 1.170   | 0.097   | 0.160 | 15.000                     | CDH26, CNTNAP2, CXCR2, FGFBP1, HMMR, HTR3B, HYAL4, P2RY1, PCSK6, PCSK9, SLC7A11, TPBG, TREML1, ULBP2, WNT5A                                                                                                                                                                                                |
| Lysosomal lumen                  | 0.965   | 0.097   | 0.160 | 3.000                      | GM2A, HPSE, SERPINB13                                                                                                                                                                                                                                                                                      |
| Golgi lumen                      | 0.779   | 0.130   | 0.210 | 3.000                      | DEFB4A, PCSK6, WNT5A                                                                                                                                                                                                                                                                                       |
| External side of plasma membrane | 0.897   | 0.140   | 0.220 | 9.000                      | CXCR1, CXCR2, CXCR6, RAET1E, RAET1G, RAET1L, TNFRSF9, ULBP1, ULBP2                                                                                                                                                                                                                                         |
| Nuclear matrix                   | 0.676   | 0.150   | 0.230 | 3.000                      | CENPF, KIF4A, UHRF1                                                                                                                                                                                                                                                                                        |
| Nuclear body                     | 0.761   | 0.160   | 0.250 | 7.000                      | EXO1, IVL, KIF18B, MCIDAS, MKI67, ZIC2, ZWINT                                                                                                                                                                                                                                                              |
| Chromatin                        | 0.580   | 0.170   | 0.260 | 3.000                      | CENPF, ESCO2, PLK1                                                                                                                                                                                                                                                                                         |
| Secretory granule lumen          | 0.564   | 0.170   | 0.260 | 3.000                      | S100A12, S100A8, S100A9                                                                                                                                                                                                                                                                                    |
| Mitochondrial outer membrane     | 0.553   | 0.190   | 0.280 | 4.000                      | ARG1, CYP24A1, IFI27, NLRX1                                                                                                                                                                                                                                                                                |
| Chromosome                       | 0.489   | 0.190   | 0.280 | 3.000                      | CDA2, ESCO2, KIF4A                                                                                                                                                                                                                                                                                         |
| Membrane                         | 0.728   | 0.210   | 0.290 | 42.000                     | ABCC1, BUB1, CCNB1, CCNB2, CDK5R1, CEP55, CNTNAP2, CXCR2, EN2, ERCC6L, FUT3, GLTP, GNAT1, GTSE1, HMMR, KIF14, KIF2C, KIF4A, KPNA2, LRG1, LRP8, MCTP2, MELK, MKI67, NCAPG, NCAPH, NEU2, OAS2, OASL, PCSK6, PGLYRP2, PGLYRP3, PGLYRP4, PLA2G4D, PRR11, RGS20, SLC16A6, SLC7A1, SLC7A5, TMEM86A, TTK, ZDHHC20 |
| Neuronal cell body               | 0.423   | 0.260   | 0.360 | 8.000                      | ARG1, CDK5R1, CNTNAP2, EPHB2, GNAT1, HTR3A, LRP8, SYT5                                                                                                                                                                                                                                                     |
| Vesicle                          | 0.205   | 0.280   | 0.380 | 3.000                      | SERPINB3, SLC6A14, TUBA1C                                                                                                                                                                                                                                                                                  |
| Collagen-containing ECM          | 0.314   | 0.290   | 0.390 | 7.000                      | HRNR, LMAN1L, PCSK6, S100A7, S100A8, S100A9, WNT5A                                                                                                                                                                                                                                                         |
| Postsynaptic membrane            | 0.142   | 0.320   | 0.420 | 4.000                      | CHRNA5, FABP5, HTR3B, P2RY1                                                                                                                                                                                                                                                                                |
| Glutamatergic synapse            | 0.186   | 0.330   | 0.430 | 7.000                      | CDKL5, EPHB2, HTR3A, KPNA2, P2RY1, SCN2A, WNT5A                                                                                                                                                                                                                                                            |
| Synapse                          | 0.035   | 0.370   | 0.470 | 5.000                      | CHRNA5, CHRNA9, FABP5, HTR3A, HTR3B                                                                                                                                                                                                                                                                        |
| Trans-Golgi network              | -0.039  | 0.370   | 0.470 | 3.000                      | CHAC1, MICALL1, RGS20                                                                                                                                                                                                                                                                                      |
| Lysosome                         | -0.286  | 0.490   | 0.610 | 4.000                      | AKR1B10, HPSE, PCSK9, PLBD1                                                                                                                                                                                                                                                                                |
| Postsynaptic density             | -0.294  | 0.490   | 0.610 | 4.000                      | CDK5R1, FABP5, LRP8, P2RY1                                                                                                                                                                                                                                                                                 |
| Dendrite                         | -0.261  | 0.510   | 0.620 | 7.000                      | CDK5R1, CNTNAP2, EPHB2, HRH3, LRP8, P2RY1, ZWINT                                                                                                                                                                                                                                                           |
| Transcription factor complex     | -0.393  | 0.520   | 0.630 | 3.000                      | ARNTL2, HNF1B, PITX1                                                                                                                                                                                                                                                                                       |
| Cytoskeleton                     | -0.327  | 0.530   | 0.630 | 6.000                      | MPZL2, S100A12, S100A8, S100A9, SLC7A11, ZC3H12A                                                                                                                                                                                                                                                           |
| Cell junction                    | -0.354  | 0.560   | 0.650 | 9.000                      | CHRNA5, CHRNA9, ESCO2, FABP5, GJB6, HTR3A, NLRX1, S100A9, SYT5                                                                                                                                                                                                                                             |
| Protein-containing complex       | -0.406  | 0.580   | 0.670 | 10.000                     | FOXP3, KIF24, NEK2, NPR3, PGLYRP3, PGLYRP4, RAD54L, SLC7A1, TOP2A, ZC3H12A                                                                                                                                                                                                                                 |
| Lysosomal membrane               | -0.620  | 0.630   | 0.720 | 4.000                      | ACPP, HPSE, PCSK9, PLA2G4E                                                                                                                                                                                                                                                                                 |
| Nuclear chromatin                | -0.661  | 0.640   | 0.720 | 3.000                      | MXD1, POLR3G, UHRF1                                                                                                                                                                                                                                                                                        |
| Endoplasmic reticulum            | -0.542  | 0.650   | 0.730 | 16.000                     | ATP10B, CRABP2, CYP2S1, DUOXA2, KCNG3, PCSK6, PCSK9, RAET1G, RAET1L, S100A7, TPBG, UGT1A10, UGT1A7, ULBP1, ULBP2, ZDHHC20                                                                                                                                                                                  |
| Early endosome                   | -0.804  | 0.700   | 0.770 | 3.000                      | CNTNAP2, MICALL1, PCSK9                                                                                                                                                                                                                                                                                    |
| Golgi membrane                   | -0.758  | 0.720   | 0.780 | 9.000                      | B3GAT1, B4GALNT2, CNGB1, FUT3, GCNT4, HS3ST3A1, LMAN1L, RAB1C, ST6GALNAC1                                                                                                                                                                                                                                  |

**Supplementary Table S5. Continued**  
 Canonical/KEGG/Reactome/BioCarta Pathways

| Term Name                      | Z-Score | P-Value | FDR   | Number of Genes Overlapped | Genes                                                                                                                          |
|--------------------------------|---------|---------|-------|----------------------------|--------------------------------------------------------------------------------------------------------------------------------|
| Cellular_component             | -0.914  | 0.760   | 0.820 | 6.000                      | <i>CDRT1, CHAC2, MAP3K9, S100A2, TTC39A, VNN3</i>                                                                              |
| Endoplasmic reticulum lumen    | -1.150  | 0.820   | 0.870 | 3.000                      | <i>ARSF, PCSK9, WNT5A</i>                                                                                                      |
| Endoplasmic reticulum membrane | -1.100  | 0.830   | 0.870 | 13.000                     | <i>ATP10B, B3GAT1, CYP2S1, DUOXA1, DUOXA2, GDPD3, IFI27, LMAN1L, NDRG4, RDH16, SLC37A2, UGT1A10, UGT1A7</i>                    |
| Golgi apparatus                | -1.500  | 0.920   | 0.950 | 12.000                     | <i>CLSPN, CNTNAP2, EHF, ESCO2, FUT2, FUT6, KBTBD8, KIF20A, PCSK9, SERINC5, SPRR3, ZDHHC20</i>                                  |
| Nuclear speck                  | -1.680  | 0.940   | 0.960 | 3.000                      | <i>E2F7, SERPINB13, SMC4</i>                                                                                                   |
| Nucleolus                      | -1.710  | 0.950   | 0.960 | 17.000                     | <i>ARNTL2, CDC6, E2F8, EMX1, EN2, ETV4, HJURP, MCIDAS, MCM10, MKI67, NEK2, OASL, PITX1, SDR9C7, SERPINB13, SNORD101, TOP2A</i> |
| Mitochondrion                  | -2.210  | 0.990   | 0.990 | 13.000                     | <i>AASS, AKR1B10, CASP14, CYP24A1, DLGAP5, HJURP, IFI27, KYNU, MXD1, NDRG4, NLRX1, P2RY1, PIF1</i>                             |

Abbreviations: ECM, extracellular matrix; FDR, false discovery rate; KEGG, Kyoto Encyclopedia of Genes and Genomes; MHC major histocompatibility complex.

*M Kim et al.*

Transcriptomic Analysis of the Major Ichthyosis Subtypes

**Supplementary Table S6. RT-PCR Primers**

RT-PCR Primers

---

18S-Hs99999901\_s1  
CAMP-Hs00189038\_m1  
CCL17-Hs00171074\_m1  
CCL18-Hs00268113\_m1  
CCL20-Hs01011368\_m1  
CCL22-Hs01574247\_m1  
CCL26-Hs00171146\_m1  
CXCL1-Hs00236937\_m1  
CXCL10-Hs00171042\_m1  
CXCL8-Hs00174103\_m1  
DEFB4B\_DEFEB4A-Hs00823638\_m1  
EREG-Hs00914313\_m1  
FLG-Hs00856927\_g1  
IFNG-Hs00989291\_m1  
IL12B-Hs01011518\_m1  
IL13-Hs00174379\_m1  
IL15-Hs01003716\_m1  
IL17A-Hs00174383\_m1  
IL17C-Hs00171163\_m1  
IL17F-Hs01028648\_m1  
IL19-Hs00604657\_m1  
IL1B-Hs01555410\_m1  
IL1RN-Hs00893626\_m1  
IL2-Hs00174114\_m1  
IL20-Hs00218888\_m1  
IL22-Hs01574154\_m1  
IL23A-Hs00372324\_m1  
IL23R-Hs00332759\_m1  
IL31-Hs01098710\_m1  
IL36A-Hs00205367\_m1  
IL36B-Hs00758166\_m1  
IL36G-Hs00219742\_m1  
IL36RN-Hs01104220\_g1  
KLK13-Hs01087305\_g1  
KYNU-Hs01114105\_m1  
LCN2-Hs01008571\_m1  
LOR-Hs01894962\_s1  
MMP12-Hs00899662\_m1  
MX1-Hs00895608\_m1  
PI3-Hs00160066\_m1  
PPL-Hs01011417\_m1  
RPLP0-Hs99999902\_m1  
S100A12-Hs00942835\_g1  
S100A7-Hs01923188\_u1  
S100A9-Hs00610058\_m1  
VNN1-Hs01546812\_m1  
VNN3-Hs01125168\_m1

---
